# Supplementary material for: Theoretical study of copper hydride complexes catalyzing terminal alkyne hydroalkylation for C(sp2)–C(sp3) bond formation
Source: Royal Society of Chemistry journal article supplement (doi:10.1039/d3dt03514j), 2023-11-17
Supplement: d3dt03514j1.pdf [file d3dt03514j1.pdf]

# Theoretical Study of Copper Hydride Complexes Catalyzing Terminal Alkyne Hydroalkylation for C(sp<sup>2</sup>)-C(sp<sup>3</sup>) Bond Formation

Hui Li<sup>a,b\*</sup>, Taiming Bai<sup>a,b</sup>  
E-mail: lihui@nun.edu.cn

## Supporting Information

### Table of Contents

|                                                                                                                                                                                                                                                           |    |
|-----------------------------------------------------------------------------------------------------------------------------------------------------------------------------------------------------------------------------------------------------------|----|
| Table S1. Energy statistics for all stationary points.....                                                                                                                                                                                                | 2  |
| Table S2. Calculation of the OSET energy barrier using Marcus theory. ....                                                                                                                                                                                | 3  |
| Table S3. Calculated electronic ( $E_{\text{HOMO}}$ ), steric ( $V_{\text{bur}\%}$ ), and backbone flexibility ( $\Delta E_{\text{dist}}$ ) parameters for alkenyl copper(I). (unit: Hartree).....                                                        | 5  |
| Figure S1. The buried volume values and steric maps of NHC-Cu.....                                                                                                                                                                                        | 6  |
| Figure S2. Performing a flexible scan on the dihedral angle ( $\angle\text{C1-C2-Cu-H}$ ) of INT2aM, with a step size of 20°.....                                                                                                                         | 7  |
| Figure S3. The visualization of different interaction forms between INT2aM and R2. (Observation perspective as the primary reaction coordinate Cu-Br-C.).....                                                                                             | 7  |
| Figure S4. INT2aM and R2 are involved in different reaction forms to form C-C bonds. (Observation perspective as the primary reaction coordinate Cu-Br-C.).....                                                                                           | 9  |
| Figure S5. Das Activation-Strain-Modell am Beispiel einer metallvermittelten C-Br-Bindungsaktivierung.....                                                                                                                                                | 10 |
| Figure S6. The SMD solvation model was used to perform EDA of TS2, TS3, TS4 in Benzene/THF (7:3) mixture solvent at $\omega\text{B97X-D/BSII}$ (6-311g(d, p), SDD) levels, respectively.(c) Steric-electronic effects were applied to TS2, TS3, TS4. .... | 12 |
| EPS and EPS (INF) of mixed solvents.....                                                                                                                                                                                                                  | 13 |
| Cartesian Coordinates.....                                                                                                                                                                                                                                | 14 |

**Table S1. Energy statistics for all stationary points.**

Energies calculated at B3LYP(D3)/BSI (6-31g(d), SDD) level in gas phase, and correction solvation energies calculated at  $\omega$ B97X-D/BSII (6-311g(d, p), SDD) in Benzene/THF(7:3) of reaction pathways. (unit: Hartree)

|                  | <i>ZPE</i> | <i>U</i> | <i>H</i> | <i>G</i> | <i>sol E</i> |
|------------------|------------|----------|----------|----------|--------------|
| <b>Cata1</b>     | 0.571016   | 0.602351 | 0.603295 | 0.515712 | -1357.99279  |
| <b>R1</b>        | 0.191814   | 0.202393 | 0.203337 | 0.155716 | -426.299348  |
| <b>INT1M</b>     | 0.766468   | 0.80951  | 0.810455 | 0.699557 | -1784.29895  |
| <b>INT1aM</b>    | 0.765138   | 0.808663 | 0.809608 | 0.697309 | -1784.30026  |
| <b>TS1M</b>      | 0.765199   | 0.80795  | 0.808894 | 0.698529 | -1784.27909  |
| <b>TS1aM</b>     | 0.764049   | 0.80717  | 0.808114 | 0.696258 | -1784.28181  |
| <b>INT2M</b>     | 0.770268   | 0.813794 | 0.814738 | 0.701673 | -1784.36732  |
| <b>INT2aM</b>    | 0.770472   | 0.813913 | 0.814857 | 0.700138 | -1784.35693  |
| <b>R2</b>        | 0.18965    | 0.200761 | 0.201705 | 0.152508 | -492.545195  |
| <b>IM1</b>       | 0.961373   | 1.017922 | 1.018866 | 0.877776 | -2276.91471  |
| <b>TS2</b>       | 0.959195   | 1.015343 | 1.016287 | 0.878293 | -2276.88106  |
| <b>INT3a</b>     | 0.772591   | 0.817722 | 0.818666 | 0.701279 | -1797.7753   |
| <b>INT3b</b>     | 0.185085   | 0.195218 | 0.196162 | 0.149334 | -479.101591  |
| <b>TS3</b>       | 0.96158    | 1.016522 | 1.017466 | 0.883061 | -2276.86055  |
| <b>TS4</b>       | 0.960361   | 1.015696 | 1.01664  | 0.881637 | -2276.8585   |
| <b>TS5(MECP)</b> | —          | —        | —        | —        | -2276.89462  |
| <b>TS6</b>       | 0.960916   | 1.016232 | 1.017176 | 0.880795 | -2276.88828  |
| <b>INT4</b>      | 0.964133   | 1.019012 | 1.019957 | 0.886083 | -2276.93179  |
| <b>TS7</b>       | 0.963833   | 1.018261 | 1.019205 | 0.886155 | -2276.93235  |
| <b>Cata2</b>     | 0.565908   | 0.598877 | 0.599821 | 0.507027 | -1370.878    |
| <b>P</b>         | 0.39618    | 0.416874 | 0.417818 | 0.347922 | -906.122683  |

For all stable points, thermodynamic corrections were performed on the transition states at a pressure of one megapascal and room temperature. Single-point energy corrections were carried out using SMD (a 7:3 mixture of benzene and tetrahydrofuran) as the solvent.

**Table S2. Calculation of the OSET energy barrier using Marcus theory.**

Marcus theory calculations for the free energy of activation of single electron transfer at  $\omega$ B97X-D/BSII (6-311g\*\*, SDD) rate determining step. (unit: Hartree)

|                           | <i>ZPE</i>   | <i>E</i>     | <i>H</i>     | <i>G</i>     |
|---------------------------|--------------|--------------|--------------|--------------|
| <b>INT2aM</b>             | -1783.573207 | -1783.530465 | -1783.529521 | -1783.651571 |
| <b>R2</b>                 | -492.351725  | -492.340899  | -492.339955  | -492.389625  |
| <b>INT2aM<sup>+</sup></b> | -1783.384304 | -1783.342109 | -1783.341165 | -1783.459803 |
| <b>R2<sup>·</sup></b>     | -492.462256  | -492.450093  | -492.449148  | -492.503952  |
| <b>INT3-b</b>             | -478.912265  | -478.902421  | -478.901477  | -478.948195  |
| <b>Br<sup>·</sup></b>     | -13.349628   | -13.348212   | -13.347268   | -13.366458   |
| <b>Br<sup>-</sup></b>     | -13.540639   | -13.539223   | -13.538279   | -13.556815   |

We used the modified Marcus theory to estimate the barriers for the stepwise outer-sphere single electron transfer (OSET-SW) and the concerted dissociative electron transfer (OSET-C) processes in the reduction of  $\alpha$ -Bromine by copper(I) compound. The DFT calculations were performed at the  $\omega$ -B97XD/6-311g\*\*// $\omega$ B97X-D/SDD/6-31G(d) level of theory in benzene/THF from 7:3 at 25°C (see Computational Methods in the manuscript for details).

OSET-SW:

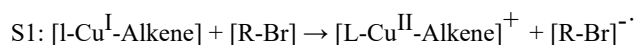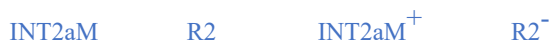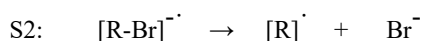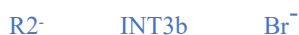

OSET-C:

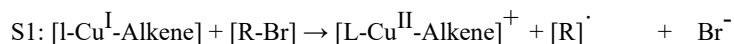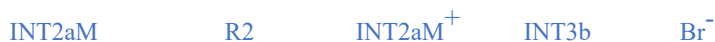

The following equation was used to calculate the activation free energy of activation ( $\Delta G_{OSET-SW}^\ddagger$ ) in the OSET-SW pathway:

$$\Delta G_{OSET-SW}^{\ddagger} = \Delta G_0^{\ddagger} \left( 1 + \frac{\Delta_r G^{\ominus}}{4\Delta G_0^{\ddagger}} \right)^2$$

Here,  $\Delta_r G^{\ominus} = 48.59$  kcal/mol is the reaction energy of eq. s1 obtained from DFT calculations. The intrinsic barrier is determined using  $\Delta G_0^{\ddagger} = \lambda_0 / 4$ , where  $\lambda_0$  is the solvent reorganization energy that can be calculated as follows:

$$\lambda_0 = A \times [(2r_D)^{-1} + (2r_A)^{-1} - (r_D + r_A)^{-1}]$$

Where  $r_D$  and  $r_A$  are the hard sphere radii of electron donor and acceptor, respectively. A is an empirical constant. Here we use  $A = 99$  kcal mol<sup>-1</sup> Å as suggested in the Coote and Matyjaszewski's study.<sup>[1]</sup>

Thus,

$$\begin{aligned} \lambda_0 &= 99 \times [(2r_{[A3-aM]})^{-1} + (2r_{[A4]})^{-1} - (r_{[A3-aM]} + r_{[A4]})^{-1}] \\ &= 99 \times [1/(2 \times 9.817) + 1/(2 \times 5.112) - 1/(9.817 + 5.112)] \\ &= 8.09 \text{ kcal/mol} \end{aligned}$$

Leading to

$$\Delta G_0^{\ddagger} = \lambda_0 / 4 = 2.02 \text{ kcal/mol}$$

Thus,

$$\Delta G_{OSET-SW}^{\ddagger} = 2.02 \times \left( 1 + \frac{48.59}{8.09} \right)^2 = 99.26 \text{ kcal/mol}$$

The dissociation of the radical anion SW1 is highly exothermic (Figure 3) and is expected to be very fast. Therefore, the rate-determining step in the OSET-SW pathway is the outer-sphere single electron transfer (eq. s1).

In the OSET-C pathway (eq. s3), the electron transfer occurs with simultaneous alkyl halide bond dissociation to form the INT3b radical and the Br<sup>-</sup> anion in a polar solvent (benzene/THF from 7:3) cage. Thus, the "sticky" model<sup>5</sup> is used to estimate the free energy of activation of the OSET-C pathway:

$$\begin{aligned} \Delta G_{OSET-C}^{\ddagger} &= \Delta G_0^{\ddagger} \left( 1 + \frac{\Delta_r G^{\ominus} - D_p}{4\Delta G_0^{\ddagger}} \right)^2 \\ \Delta G_0^{\ddagger} &= \frac{R2(BDE) + \lambda_0}{4} \end{aligned}$$

where  $\Delta G_0^{\ddagger}$  is the intrinsic barrier;  $\Delta_r G^{\ominus} = 47.93$  kcal/mol is the DFT-calculated reaction energy for eq. s3;  $D_p$  is the interaction energy between MMA• and Br<sup>-</sup> in the solvent cage, and the experimental data of  $D_p = 1.13$  kcal/mol is used in our calculation;  $D_{MMA-Br}$  is the MMA-Br bond dissociation enthalpy calculated using DFT ( $D_{R2} = 57.24$  kcal/mol);  $\lambda_0$  is the solvent reorganization energy that is the same as that in the OSET-SW pathway ( $\lambda_0 = 8.09$  kcal/mol).

$$\begin{aligned} \Delta G_0^{\ddagger} &= \frac{(\sqrt{D_{R2}} - \sqrt{D_p})^2 + \lambda_0}{4} = \frac{(\sqrt{57.24} - \sqrt{1.13})^2 + 8.09}{4} = 12.60 \text{ kcal/mol} \\ \Delta G_{OSET-C}^{\ddagger} &= \Delta G_0^{\ddagger} \left( 1 + \frac{\Delta_r G^{\ominus} - D_p}{4\Delta G_0^{\ddagger}} \right)^2 = 8.88 \times \left( 1 + \frac{47.93 - 1.13}{4 \times 12.60} \right)^2 = 46.87 \text{ kcal/mol} \end{aligned}$$

**Table S3. Calculated electronic ( $E_{\text{HOMO}}$ ), steric ( $V_{\text{bur}\%}$ ), and backbone flexibility ( $\Delta E_{\text{dist}}$ ) parameters for alkenyl copper(I). (unit: Hartree)**

To further understand the influence of ligands on electron transfer, we used the SambVca web server software to calculate the buried volume percentage  $V_{\text{bur}\%}$  of the catalyst, combined with the energy  $E_{\text{HOMO}}$  of the highest occupied orbital and the distortion energy  $\Delta E_{\text{dist}}$  of the catalyst, to describe the electronic effect, steric effect, and skeleton flexibility effect in the ISET process. After calculation,  $E_{\text{HOMO}} = -4.9$  eV,  $V_{\text{bur}\%} = 46.1$ ,  $\Delta E_{\text{dist}} = 14.64$  kcal·mol<sup>-1</sup>. Details of the calculations can be found in Table S3 & Figure S1. Compared with the guiding data in the literature, it is known that the distinct electronic effect of NHC ligands promotes the occurrence of the reaction with a lower energy barrier in the process of catalytic activation of C-Br bonds by alkenyl copper(I) complexes.

|       | $E+ZPE$      | $E$          | $H$          | $G$          | $EE$         |
|-------|--------------|--------------|--------------|--------------|--------------|
| TS2   | -2275.92186  | -2275.865712 | -2275.864768 | -2276.002762 | -2276.88106  |
| F-TS2 | -2275.917527 | -2275.861405 | -2275.860461 | -2275.999271 | -2276.876623 |

$\Delta E$  The bond angle of TS2 (Cu---Br---C) was fixed at 179°, referred to as F-TS2, for constrained optimization, and the difference between F-TS2 and TS2 was calculated.

$$\Delta E = E_{\text{F-TS2}} - E_{\text{TS2}} = 2.78 \text{ kcal}\cdot\text{mol}^{-1}$$

Figure S1. The buried volume values and steric maps of NHC-Cu.

| %V Free | %V Buried | % V Tot/V Ex |
|---------|-----------|--------------|
| 53.9    | 46.1      | 99.9         |

| Quadrant | V f  | V b  | V t  | %V f        | %V b |
|----------|------|------|------|-------------|------|
| SW       | 27.1 | 17.7 | 44.9 | <b>60.5</b> | 39.5 |
| NW       | 24.3 | 20.6 | 44.9 | <b>54.1</b> | 45.9 |
| NE       | 23.0 | 21.9 | 44.9 | <b>51.3</b> | 48.7 |
| SE       | 22.2 | 22.6 | 44.9 | <b>49.6</b> | 50.4 |

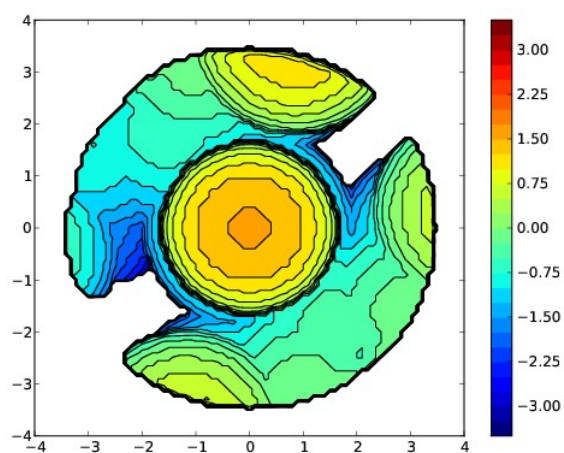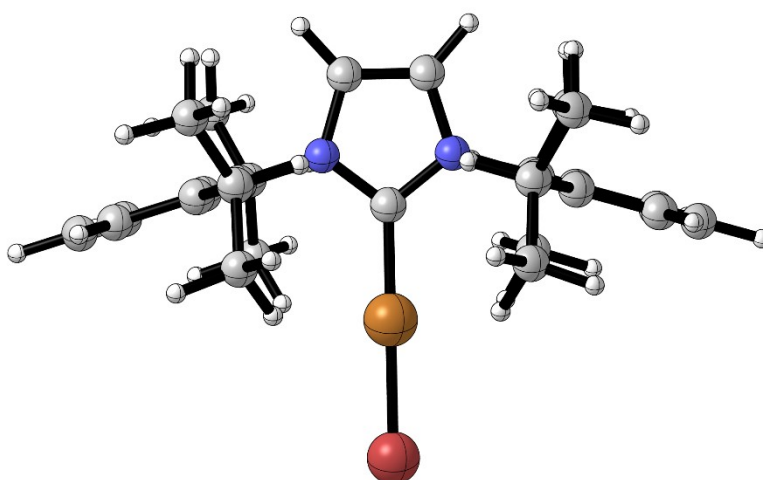

Figure S2. Performing a flexible scan on the dihedral angle ( $\angle C1-C2-Cu-H$ ) of INT2aM, with a step size of  $20^\circ$

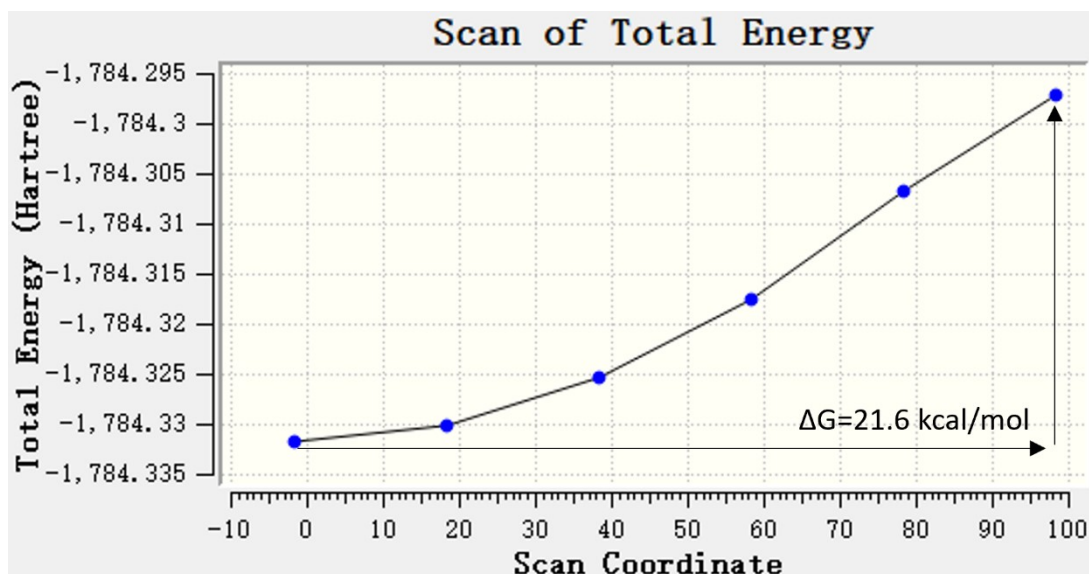

Figure S3. The visualization of different interaction forms between INT2aM and R2. (Observation perspective as the primary reaction coordinate Cu-Br-C.)

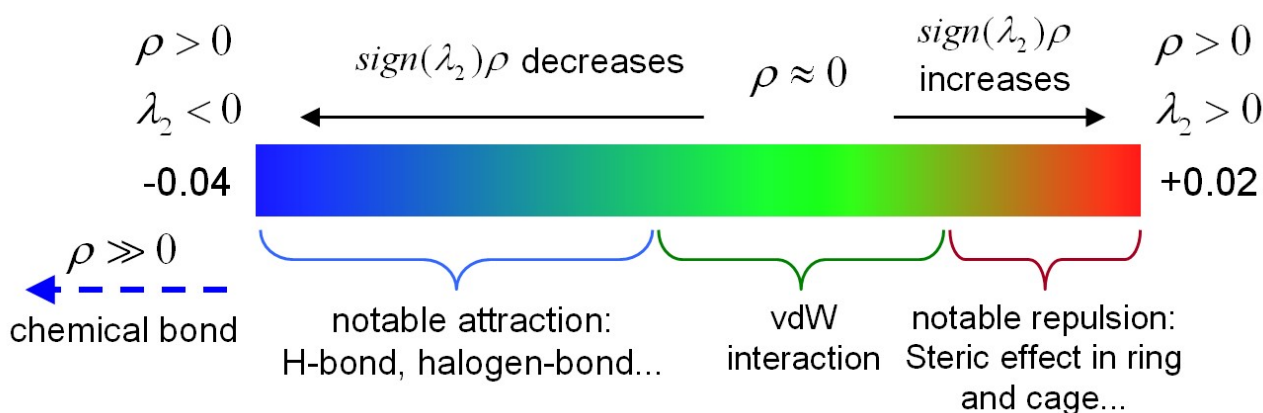

The above color scheme indicates that if an IRI contour is predominantly green, it implies the presence of a van der Waals interaction region (or it could be a very weak hydrogen bond, where dispersion forces dominate). If the contour color is noticeably reddish, it suggests the presence of steric hindrance. If it is bright red, it indicates strong steric hindrance. If the contour color is noticeably bluish, it suggests a significant attractive interaction. If the contour is entirely blue, it means that the region either exhibits relatively strong weak interactions, with the electron density of the interacting region reaching a level of  $\geq 0.04$  a.u., or it involves chemical bonding, where the electron density in the bonding region is typically significantly greater than 0.04 a.u. The equivalent surface is 0.08.

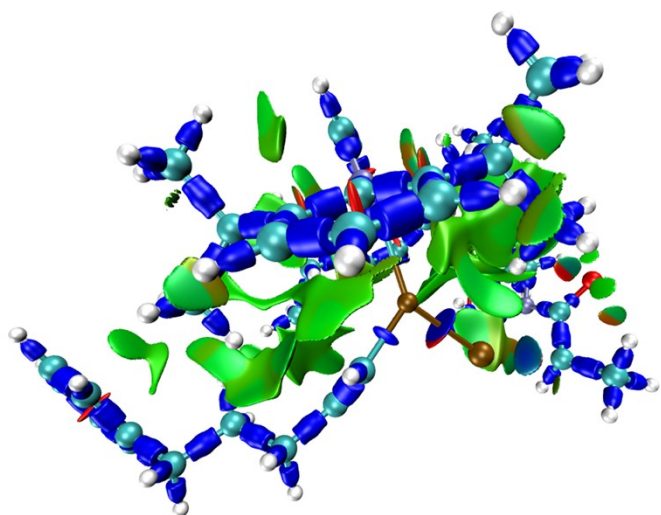

TS2

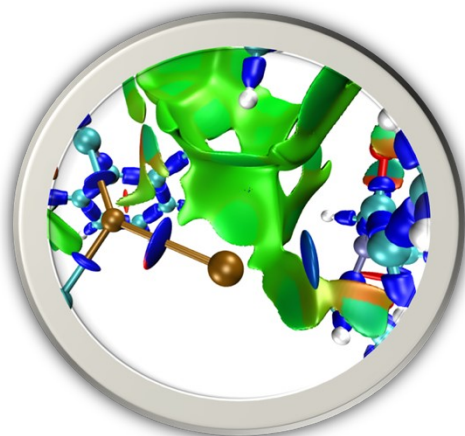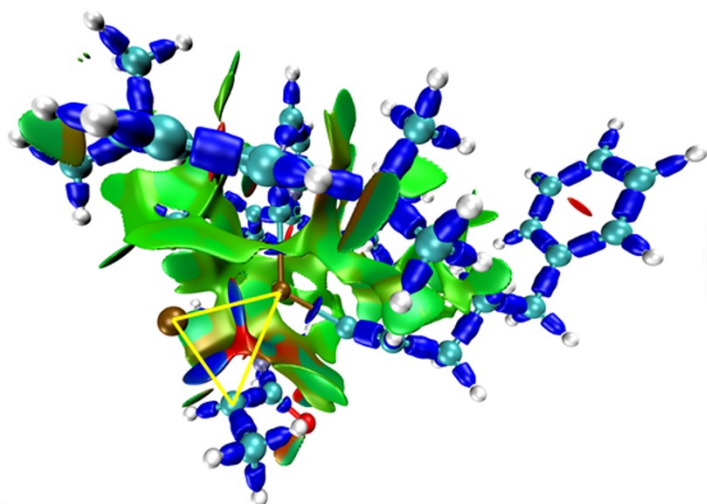

TS3

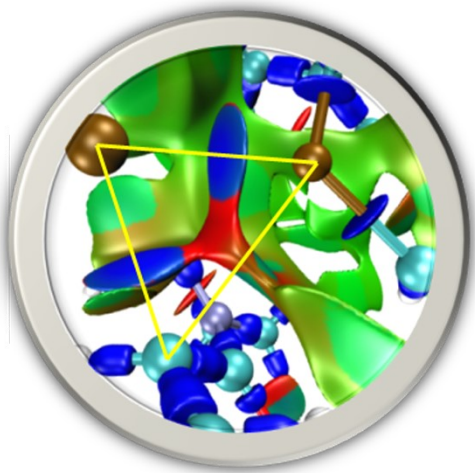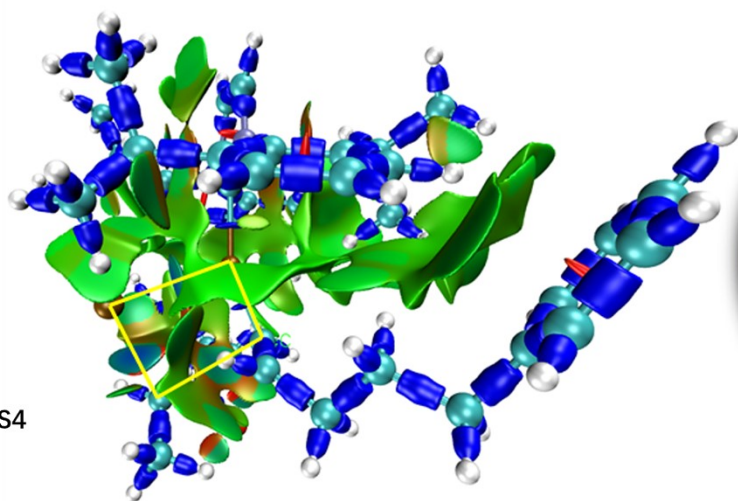

TS4

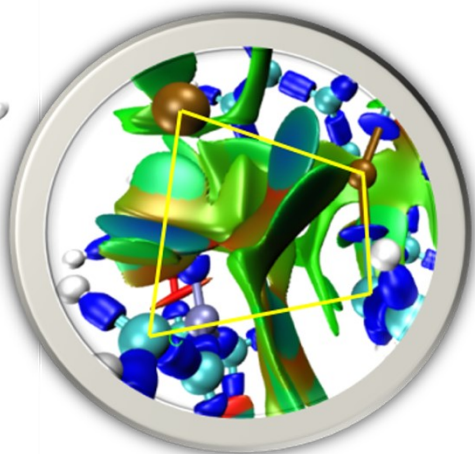



Figure S4. INT2aM and R2 are involved in different reaction forms to form C-C bonds. (Observation perspective as the primary reaction coordinate Cu-Br-C.)

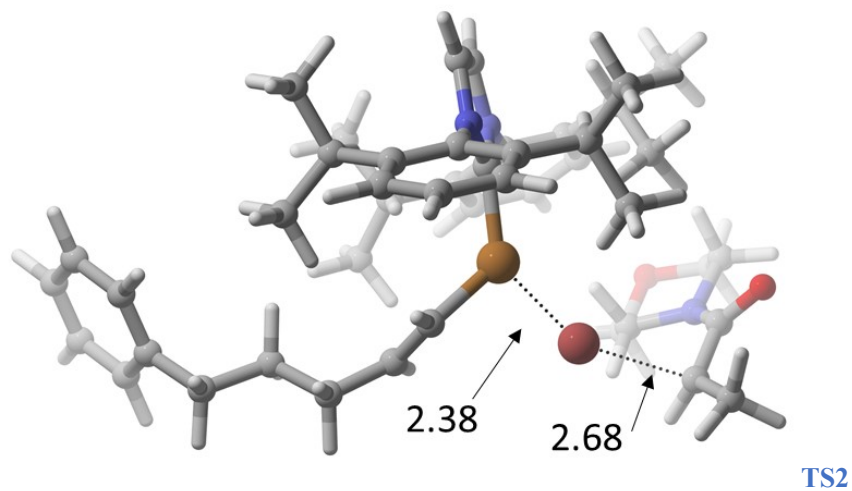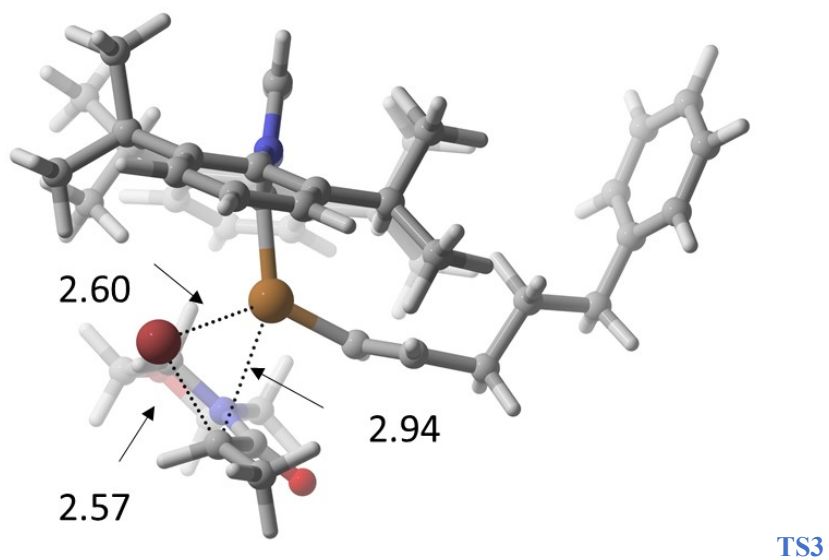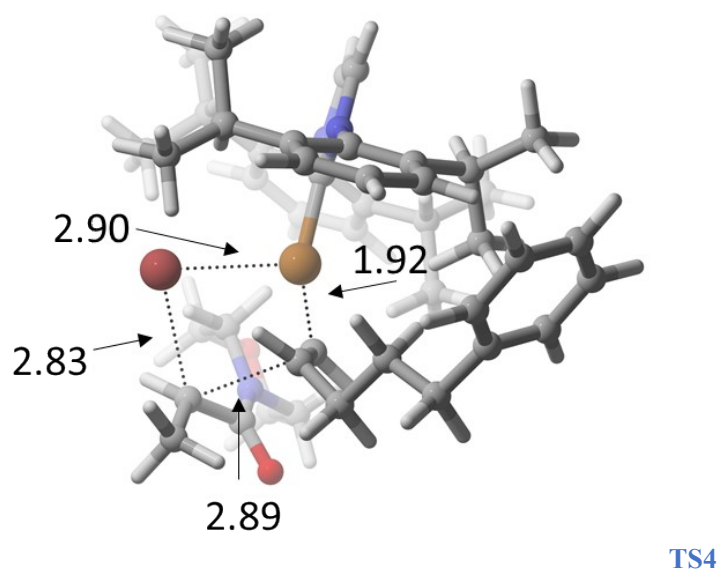

### Figure S5. Das Activation-Strain-Modell am Beispiel einer metallvermittelten C-Br-Bindungsaktivierung

Distortion/interaction model and energy decomposition analysis (EDA) calculations in Figure 5 were performed to dissect the computed gas-phase activation energy ( $\Delta E^\ddagger$ ). The activation energy was first decomposed into the distortion energy of the two reactive fragments, i.e. the alkene copper(I) and the  $\alpha$ -bromo amide, to reach their transition state geometries ( $\Delta E_{\text{strain}} = \Delta E_{\text{dist}}(\text{INT2aM}) + \Delta E_{\text{dist}}(\text{R2})$ ) and the interaction energy ( $\Delta E_{\text{int}}$ ) between these two fragments (eq. 1)

Here, the distortion energies were calculated from the energy difference between the distorted fragment in the transition state geometry and the same fragment in the fully optimized ground state geometry. Then,  $\Delta E_{\text{int}}$  is calculated from  $\Delta E_{\text{int}} = \Delta E_{\text{strain}} - \Delta E^\ddagger$ .

$$\Delta E^\ddagger = \Delta E_{\text{strain}} + \Delta E_{\text{int}}$$

$$\Delta E^\ddagger = \underbrace{\Delta E_{\text{strain}} + \Delta E_{\text{exrep}}}_{\text{steric effects } (\Delta E_{\text{steric}})} + \underbrace{\Delta E_{\text{ele}} + \Delta E_{\text{pol}}}_{\text{electronic effects } (\Delta E_{\text{electronic}})} + \underbrace{\Delta E_{\text{corr/disp}} + \Delta E_{\text{desol}}}_{\text{dispersion desolvation}} + \underbrace{\Delta E_{\text{orbital}}}_{\text{orbital Interaction } (\Delta E_{\text{orbital}})}$$

(1)

|                                      | $\Delta E_{\text{strain}}$ | $\Delta E_{\text{exrep}}$ | $\Delta E_{\text{eles}}$ | $\Delta E_{\text{pol}}$ | $\Delta E_{\text{corr/disp}}$ | $\Delta E_{\text{desol}}$ |
|--------------------------------------|----------------------------|---------------------------|--------------------------|-------------------------|-------------------------------|---------------------------|
| <b>ISSET[2.06]</b>                   | 6.35                       | 17.44                     | -6.65                    | -2.28                   | -17.07                        | 0.31                      |
| <b>ISSET[2.30]</b>                   | 22.76                      | 45.46                     | -19.77                   | -11.25                  | -26.11                        | 0.62                      |
| <b>ISSET[TS2]</b>                    | 31.78                      | 58.18                     | -25.27                   | -17.45                  | -40.1                         | 1.31                      |
| <b>OA[2.06]</b>                      | 15.84                      | 35.50                     | -16.25                   | -5.33                   | -28.54                        | 0.01                      |
| <b>OA[2.30]</b>                      | 30.08                      | 63.71                     | -31.95                   | -11.87                  | -34.25                        | 0.28                      |
| <b>OA[TS3]</b>                       | 51.51                      | 74.03                     | -38.08                   | -17.1                   | -41.65                        | 0.4                       |
| <b><math>\sigma</math>-BM [2.06]</b> | 16.7                       | 32.80                     | -12.84                   | -4.4                    | -28.2                         | 0.07                      |
| <b><math>\sigma</math>-BM [2.30]</b> | 20.2                       | 54.25                     | -25.26                   | -9.87                   | -32.17                        | 0.21                      |
| <b><math>\sigma</math>-BM [2.60]</b> | 34.59                      | 60.04                     | -29.32                   | -12.95                  | -32.52                        | 0.46                      |
| <b><math>\sigma</math>-BM [TS4]</b>  | 48.3                       | 71.66                     | -35.92                   | -22.31                  | -34.81                        | 0.32                      |

In this system, the activation energy of the transition state is decomposed into reaction strain ( $\Delta E_{\text{strain}}$ ) (In other literature, it is also referred to as distortion energy ( $\Delta E_{\text{dist}}$ )) and interaction ( $\Delta E_{\text{int}}$ ) between the alkenyl copper and  $\alpha$ -

bromo amide fragments. Using the GKS-EDA method,  $\Delta E_{\text{int}}$  is further broken down into electrostatic interaction  $\Delta E_{\text{eles}}$ , Pauli repulsion  $\Delta E_{\text{exrep}}$ , polarization effects and charge transfer effects, along with several other components collectively termed polarization interaction  $\Delta E_{\text{pol}}$ , desolvation  $\Delta E_{\text{desol}}$ , dispersion, and correlation energy  $\Delta E_{\text{corr/disp}}$ .

Due to variations in energy decomposition models, our quantification model for steric-electronic effects, as per formula (1), allows for the quantitative assessment of steric hindrance, electronic effects, and dispersion effects. Steric hindrance,  $\Delta E_{\text{steric}}$ , is calculated as the sum of  $\Delta E_{\text{strain}}$  and  $\Delta E_{\text{exrep}}$ , with impacts on the three reaction types being  $\Delta E_{\text{steric}}(\text{TS2}) = 89.96 \text{ kcal} \cdot \text{mol}^{-1}$ ,  $\Delta E_{\text{steric}}(\text{TS3}) = 125.54 \text{ kcal} \cdot \text{mol}^{-1}$ , and  $\Delta E_{\text{steric}}(\text{TS4}) = 119.96 \text{ kcal} \cdot \text{mol}^{-1}$ . Electronic effects,  $\Delta E_{\text{electronic}}$ , are represented by  $\Delta E_{\text{ele}}$  and  $\Delta E_{\text{pol}}$ , and their effects are  $\Delta E_{\text{electronic}}(\text{TS2}) = -42.72 \text{ kcal} \cdot \text{mol}^{-1}$ ,  $\Delta E_{\text{electronic}} = -55.18 \text{ kcal} \cdot \text{mol}^{-1}$ , and  $\Delta E_{\text{electronic}}(\text{TS4}) = -58.23 \text{ kcal} \cdot \text{mol}^{-1}$ . From the points and transition states selected along the IRC, spatial steric hindrance  $\Delta E_{\text{steric}}$  and dispersion-related energy promote the ISET pathway, while electronic effects enhance the non-radical pathway.

Figure S6. The SMD solvation model was used to perform EDA of TS2, TS3, TS4 in Benzene/THF (7:3) mixture solvent at  $\omega$ B97X-D/BSII (6-311g(d, p), SDD) levels, respectively.(c) Steric-electronic effects were applied to TS2, TS3, TS4.

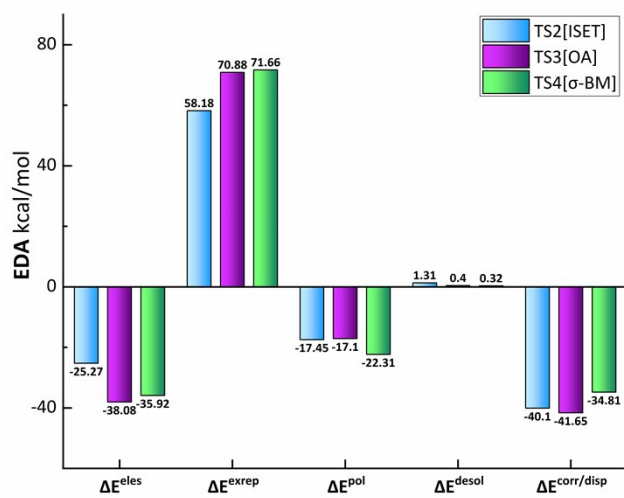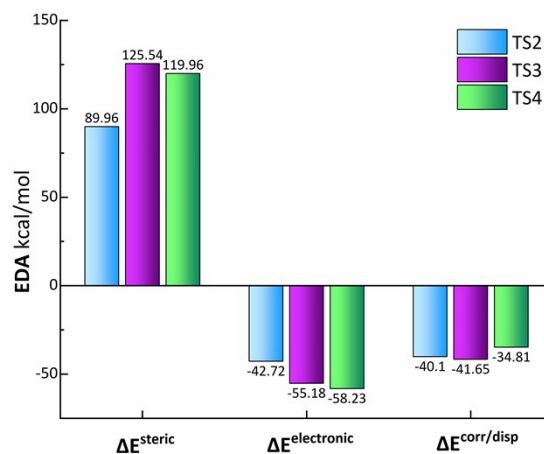

## EPS and EPS (INF) of mixed solvents

EPS and EPSINF of mixed solvent Benzene/THF (7:3)

Calculation of static permittivity (eps):

Benzene( $\epsilon/\epsilon_0$ )=2.2706

THF( $\epsilon/\epsilon_0$ )=7.4257

According to the original literature, the volume ratio of mixed solvents:

Benzene/THF=7: 3

So the static permittivity (eps) of Benzene/THF is  $(7/10) * 2.2706 + (3/10) * 7.4257 = 3.81713$

The calculation of dynamic permittivity (epsinf):

The refractive index of Benzene is 1.5011

The refractive index of THF is 1.4050

According to the original literature, the volume ratio of mixed solvents:

Benzene/THF=7: 3

So the dynamic permittivity (EPSINF) of Benzene/THF mixed solvent is  $(7/10) * (1.5011)^2 + (3/10) * (1.4050)^2 \approx 2.169518347$

## Cartesian Coordinates

### Catal

Cu -0.31167107 0.38461538 0.00000000  
C 0.36725193 0.38442038 4.11273400  
C -0.99086207 0.38437638 4.11269200  
H 1.08459393 0.38439838 4.91815100  
H -1.70825207 0.38431338 4.91806600  
N 0.75936093 0.38447938 2.77917300  
N -1.38289407 0.38442138 2.77910800  
C -0.31174007 0.38450838 1.93502700  
C 2.01448693 2.94299038 2.26392500  
C 1.63813993 3.52331838 0.88644600  
C 2.81321993 3.95637238 3.10169700  
H 1.08035893 2.74544638 2.79987300  
H 1.03966593 2.80946638 0.30942400  
H 1.05774593 4.44623038 1.00456900  
H 2.53736493 3.75653738 0.30397400  
H 3.08265793 3.54226738 4.08005000  
H 3.73846393 4.25945538 2.59867300  
H 2.21775593 4.86212538 3.26446800  
C -2.63799207 -2.17408062 2.26370600  
C -2.26164907 -2.75440562 0.88622300  
C -3.43672807 -3.18746862 3.10146600  
H -1.70386507 -1.97654662 2.79966000  
H -1.66316507 -2.04056262 0.30920200  
H -1.68127007 -3.67732762 1.00434200  
H -3.16087807 -2.98760762 0.30374900  
H -3.70618007 -2.77336862 4.07981700  
H -4.36196407 -3.49055862 2.59843100

H -2.84126007 -4.09321862 3.26424100  
C -4.69300207 -0.82456962 1.61815600  
C -3.37512007 -0.85222062 2.08871100  
C -2.74864507 0.38440238 2.32199900  
C -3.37524807 1.62101638 2.08899800  
C -4.69312607 1.59333838 1.61843500  
C -5.34650807 0.38437738 1.38878400  
H -5.20704407 -1.75901462 1.41395100  
H -5.20726407 2.52777638 1.41443900  
H -6.36800407 0.38436738 1.01794000  
C 4.06959893 -0.82440962 1.61850200  
C 2.75171793 -0.85209762 2.08905500  
C 2.12513393 0.38451038 2.32213500  
C 2.75162193 1.62113738 2.08891800  
C 4.06950693 1.59349838 1.61837000  
C 4.72300193 0.38455738 1.38893600  
H 4.58372193 -1.75884262 1.41444200  
H 4.58355493 2.52795038 1.41420700  
H 5.74449793 0.38457538 1.01809300  
C 2.81359093 -3.18739462 3.10171700  
C 2.01465593 -2.17397562 2.26418600  
H 1.08065093 -1.97647262 2.80036500  
H 3.08332293 -2.77331662 4.08000000  
H 2.21813693 -4.09312762 3.26464200  
H 3.73867793 -3.49051462 2.59842600  
C 1.63799693 -2.75424362 0.88676400  
H 1.03935893 -2.04038562 0.30992100  
H 2.53709693 -2.98738762 0.30406900  
H 1.05766993 -3.67718662 1.00497300  
C -2.63823207 2.94290438 2.26426300

H -1.70416207 2.74536438 2.80031500  
C -2.26175307 3.52341938 0.88689700  
H -1.68144907 4.44636638 1.00519700  
H -1.66315407 2.80968538 0.30986200  
H -3.16092807 3.75662838 0.30434300  
C -3.43713307 3.95614538 3.10204200  
H -2.84171107 4.86188338 3.26505100  
H -4.36228907 4.25929638 2.59889800  
H -3.70673907 3.54189338 4.08028600  
H -0.31156207 0.38473638 -1.52317400

**R1**

C -0.96153840 -0.05305040 0.00000000  
C -1.82027040 -0.09536840 0.84793900  
H -0.19958840 -0.01535740 -0.74494100  
C -2.88276440 -0.14725140 1.85184600  
H -2.77359940 -1.06046840 2.45432800  
H -2.76848440 0.69312560 2.55150300  
C -4.29540740 -0.10925540 1.23332300  
H -4.41140340 -0.94834640 0.53681900  
H -4.40967040 0.80553560 0.63951300  
C -5.39898740 -0.17086040 2.30495300  
H -5.27357140 0.67126160 2.99905700  
C -6.78455840 -0.13712140 1.69947000  
C -7.44013440 -1.32275840 1.34304900  
C -7.42134940 1.08249160 1.43434600  
C -8.69790340 -1.29308140 0.73914600  
H -6.95966040 -2.27816340 1.54423600  
C -8.67876040 1.11822560 0.83033000

H -6.92634040 2.01233760 1.70739300  
C -9.32170440 -0.07097340 0.48058900  
H -9.19209540 -2.22421340 0.47393300  
H -9.15807040 2.07439260 0.63640300  
H -10.30248740 -0.04545140 0.01328400  
H -5.27283640 -1.08649440 2.89827300

**INTIM**

Cu 0.35145886 0.06631300 0.00000000  
C 0.56289686 -0.55683800 -4.12912100  
C 0.93236786 0.74436700 -4.07675600  
H 0.36694686 -1.21095800 -4.96286300  
H 1.12753886 1.46299900 -4.85589600  
N 0.43342486 -0.98716400 -2.80826100  
N 1.01912986 1.08129700 -2.72799400  
C 0.70934586 0.01969200 -1.92070400  
C -2.35271114 -1.22982600 -2.02559400  
C -3.46307614 -1.36446900 -0.97459200  
C -2.94620214 -0.94533900 -3.41986800  
H -1.76609314 -0.36249500 -1.71786100  
H -3.04223114 -1.59612000 0.00886900  
H -3.99926714 -0.41293700 -0.89205900  
H -4.19812214 -2.13569000 -1.23653400  
H -2.16305614 -0.75985600 -4.16238500  
H -3.55283714 -1.79066900 -3.76811200  
H -3.58872514 -0.05719800 -3.38271200  
C 3.71189986 2.11046000 -2.27793500  
C 4.85352586 2.41356200 -1.29448400  
C 4.20167286 2.30314700 -3.72787400

|                                       |                                      |
|---------------------------------------|--------------------------------------|
| H 3.44386286 1.05659200 -2.15331800   | H 2.21743786 -4.67071600 -4.59815800 |
| H 4.50653886 2.38005100 -0.25606900   | C 3.22378986 -4.05587800 -2.06030100 |
| H 5.65328186 1.67801100 -1.41704400   | H 3.05392686 -3.84025900 -1.00146300 |
| H 5.28926786 3.40408400 -1.47143300   | H 3.09251586 -5.13309700 -2.21011800 |
| H 3.43924986 2.00285700 -4.45434100   | H 4.26648286 -3.82139500 -2.29933200 |
| H 4.44643686 3.35620200 -3.91283000   | C -1.37902714 2.66202200 -2.42209000 |
| H 5.09961986 1.70274800 -3.90705200   | H -1.31933314 1.57279400 -2.39995900 |
| C 2.56481086 4.27866900 -1.60711400   | C -2.44593414 3.05818600 -1.39044000 |
| C 2.46336886 2.94596900 -2.02634700   | H -3.39080214 2.55538400 -1.63011900 |
| C 1.17280286 2.43925300 -2.26151400   | H -2.13768914 2.74402500 -0.38978300 |
| C 0.00459686 3.21061900 -2.09511100   | H -2.64218914 4.13726600 -1.38991000 |
| C 0.16416786 4.53602100 -1.67625900   | C -1.79926114 3.08814900 -3.84304000 |
| C 1.42893086 5.06467400 -1.43198600   | H -2.77554714 2.65810200 -4.09703400 |
| H 3.54308786 4.70691800 -1.41614700   | H -1.87794014 4.17977100 -3.91595400 |
| H -0.71253314 5.16094100 -1.53921700  | H -1.07625314 2.75219400 -4.59458100 |
| H 1.53046686 6.09616200 -1.10442900   | H -1.01075514 0.81055900 0.15531000  |
| C 0.29678986 -4.66479000 -2.26047300  | C 0.72395086 -0.33560000 1.86234500  |
| C 0.81622586 -3.39464400 -2.54172900  | C 1.69371686 -0.82282100 1.22831900  |
| C -0.05800914 -2.29600300 -2.45260100 | H 0.14871086 -0.09589500 2.73695300  |
| C -1.41226314 -2.42933800 -2.07546300 | C 2.98541786 -1.53210400 1.08339500  |
| C -1.87404414 -3.71951500 -1.79178300 | H 3.52469786 -1.51384500 2.04286400  |
| C -1.03380014 -4.82669100 -1.88875000 | H 2.78264786 -2.58985600 0.86305800  |
| H 0.94210086 -5.53494900 -2.32939500  | C 3.87499286 -0.94589500 -0.02129200 |
| H -2.90703014 -3.86174800 -1.49367200 | H 4.02932986 0.12117000 0.17081700   |
| H -1.41851614 -5.81932800 -1.66972900 | H 3.32961786 -1.00784500 -0.96892700 |
| C 2.48135386 -3.61955600 -4.43210700  | C 5.23689486 -1.65119300 -0.13160800 |
| C 2.27492186 -3.23794700 -2.95312400  | H 5.07108986 -2.72558000 -0.28607800 |
| H 2.53919286 -2.18113600 -2.83961100  | C 6.10253486 -1.10528400 -1.24795000 |
| H 1.86220786 -3.01041500 -5.09807700  | C 7.34007086 -0.50751600 -0.97666800 |
| H 3.52996386 -3.48192100 -4.72281200  | C 5.67864586 -1.16842700 -2.58456700 |



|                                       |                                       |
|---------------------------------------|---------------------------------------|
| C 8.13192286 0.01257200 -2.00366200   | H -6.14620571 3.37586959 1.35454300   |
| H 7.68444086 -0.44379900 0.05306000   | H -4.69009571 2.59663659 -0.48877000  |
| C 6.46795186 -0.65742400 -3.61511100  | H -6.40217371 -1.32821541 -0.19871200 |
| H 4.71769886 -1.61469700 -2.82207400  | H -7.85390671 -0.56292041 1.65773000  |
| C 7.69888486 -0.06088300 -3.32845100  | C -4.49878171 0.09711259 -1.55356800  |
| H 9.08641286 0.47545000 -1.76689900   | H -4.95860571 -0.71609041 -2.13096300 |
| H 6.11895186 -0.72105600 -4.64267700  | H -4.29008571 0.91096959 -2.26074600  |
| H 8.31257686 0.34177300 -4.12961200   | C 1.08765929 0.47574159 3.98646700    |
| H 5.77059686 -1.55847700 0.82295000   | C 2.34047829 0.68872259 3.51075000    |
|                                       | H 0.69692129 0.46029559 4.99129500    |
| <b>INT1aM</b>                         | H 3.27163429 0.90173359 4.01146000    |
|                                       | N 0.27752929 0.25811159 2.87686700    |
| Cu 0.07294429 0.14588859 0.00000000   | N 2.25567529 0.59848259 2.12015100    |
| H -0.62993071 1.48544059 -0.39853000  | C 0.98457229 0.33395959 1.71117400    |
| C 0.07355829 -1.74431141 -0.71151800  | C -1.55333771 2.49351159 2.74022300   |
| C -0.83143871 -1.07676241 -1.26535100 | C -1.61156171 3.15483759 4.13089100   |
| H 0.63342529 -2.63664541 -0.50787000  | C -2.32006971 3.31675959 1.69339300   |
| C -2.09491471 -0.75240241 -1.96310500 | H -0.50901871 2.47741759 2.41556200   |
| H -1.92854471 0.09507359 -2.63778800  | H -1.00686171 2.60376759 4.86103900   |
| H -2.42137071 -1.60960341 -2.57103800 | H -1.23548671 4.18396159 4.08502700   |
| C -3.17558171 -0.37691141 -0.92896100 | H -2.64225071 3.18570959 4.50488300   |
| H -2.76586871 0.41798559 -0.29714700  | H -2.23958871 2.83914459 0.71257800   |
| H -3.36351471 -1.23100041 -0.26602300 | H -3.37961371 3.43047659 1.94987700   |
| C -7.09179071 1.45579059 1.63674000   | H -1.88564471 4.32114459 1.62311600   |
| C -6.20530971 2.34296459 1.02016800   | C 3.05648129 3.28415459 1.44614800    |
| C -5.39101871 1.90611359 -0.02582500  | C 1.91530629 3.67679259 0.48369700    |
| C -5.44878371 0.58149359 -0.48045500  | C 3.98216529 4.48011859 1.72138200    |
| C -6.34619971 -0.29615941 0.14131900  | H 2.59526229 3.01109459 2.40152200    |
| C -7.16136571 0.13334559 1.19100900   | H 1.21490229 2.85090759 0.31924500    |
| H -7.72735771 1.79335859 2.45112000   | H 1.35491929 4.52904859 0.88843200    |

H 2.32394829 3.97082859 -0.49116300  
H 4.82676329 4.20053359 2.36176700  
H 4.38546429 4.90616659 0.79548200  
H 3.41959029 5.27566359 2.22269000  
C 4.87300729 2.18937859 0.02715900  
C 3.79160029 2.06121159 0.90778000  
C 3.36075829 0.75733159 1.21276200  
C 3.94220829 -0.39732741 0.65374000  
C 5.01998229 -0.21244141 -0.21934600  
C 5.48338929 1.06606559 -0.52497200  
H 5.23536729 3.17697159 -0.23823400  
H 5.50011529 -1.07357141 -0.67173300  
H 6.32108629 1.18717759 -1.20687000  
C -2.92465971 -1.61982341 2.95118700  
C -1.54739571 -1.36927441 2.94370200  
C -1.13524071 -0.02457041 2.90096300  
C -2.03732871 1.05151259 2.82036100  
C -3.40342671 0.74665959 2.83351500  
C -3.84313271 -0.57311241 2.90009300  
H -3.28302371 -2.64383741 2.98559300  
H -4.13585871 1.54233159 2.76269600  
H -4.90888571 -0.78038441 2.88309300  
C -0.94828171 -3.71344441 2.13618800  
C -0.53613071 -2.50791941 2.99683700  
H 0.40692229 -2.13340741 2.58711800  
H -1.19016371 -3.39859441 1.11651900  
H -0.12574071 -4.43725241 2.09096800  
H -1.81735971 -4.23658441 2.55163900  
C -0.27373171 -2.93421541 4.45443600  
H 0.09646229 -2.09480841 5.05321700

H -1.19469771 -3.30213141 4.92267800  
H 0.47376529 -3.73579141 4.49482900  
C 3.42559229 -1.78828841 1.00788500  
H 2.34661029 -1.69987041 1.16439000  
C 3.62104129 -2.81724341 -0.11549400  
H 3.10335229 -3.74844041 0.14382200  
H 3.21461029 -2.45105841 -1.06416300  
H 4.67725829 -3.06906741 -0.26784500  
C 4.05691429 -2.28951041 2.32213900  
H 3.65471129 -3.27425041 2.58972700  
H 5.14499229 -2.38210741 2.21911400  
H 3.85082029 -1.60551541 3.15166500

#### **TS1M**

Cu -1.45225454 0.57029177 0.00000000  
C -2.28776754 0.44400177 -4.02480800  
C -1.85291854 1.72432877 -3.94007500  
H -2.65510054 -0.13479623 -4.85722900  
H -1.76380254 2.50063177 -4.68284400  
N -2.19919254 -0.09065123 -2.74112100  
N -1.50269054 1.94070277 -2.60863600  
C -1.73135954 0.83037177 -1.84239100  
C -5.02038354 -0.38837823 -2.15941700  
C -5.36606254 0.05001977 -0.72266400  
C -6.28719354 -0.69459423 -2.97668600  
H -4.52452554 0.45774577 -2.64435000  
H -4.46094054 0.32961877 -0.17255300  
H -6.04258954 0.91324077 -0.73976200  
H -5.86372954 -0.76196423 -0.17830200

|                                       |                                       |
|---------------------------------------|---------------------------------------|
| H -6.03876554 -1.01679523 -3.99452400 | H -3.96677754 -4.89390123 -1.40621800 |
| H -6.89155854 -1.48236223 -2.51285000 | C 0.09460746 -2.23283323 -3.97733200  |
| H -6.91517254 0.20130777 -3.04430300  | C -0.25340454 -2.20733623 -2.47557800 |
| C 1.32336946 2.61091977 -2.40097400   | H -0.03257654 -1.20581923 -2.09110700 |
| C 2.65313346 2.87805277 -1.67906500   | H -0.47158654 -1.48148423 -4.53587100 |
| C 1.56020246 2.60645677 -3.92519800   | H 1.16159846 -2.02618723 -4.12635100  |
| H 0.98895246 1.60800377 -2.11022000   | H -0.12451854 -3.21698223 -4.40912500 |
| H 2.51355146 2.95762377 -0.59589800   | C 0.63885446 -3.19001123 -1.70378200  |
| H 3.35290446 2.06294777 -1.87646300   | H 0.36166146 -3.22843523 -0.64582700  |
| H 3.12426446 3.80386277 -2.03126000   | H 0.58251846 -4.20574123 -2.11305200  |
| H 0.66358546 2.31557177 -4.47997100   | H 1.68502846 -2.87434023 -1.76901000  |
| H 1.86741346 3.60171177 -4.26938400   | C -3.64510354 3.65349577 -1.68284300  |
| H 2.35856446 1.89774677 -4.17457500   | H -3.69868154 2.62262177 -2.04226300  |
| C 0.51464646 4.87085577 -1.53082000   | C -4.24400154 3.65816677 -0.26455700  |
| C 0.21937846 3.58568377 -2.00010500   | H -5.28508154 3.31535377 -0.29430700  |
| C -1.14171354 3.22882077 -2.07678600  | H -3.67951154 2.98455477 0.38863600   |
| C -2.18175854 4.07877777 -1.66050100  | H -4.23409954 4.66327077 0.17357200   |
| C -1.82940454 5.35264377 -1.19719600  | C -4.46703854 4.52314877 -2.65128900  |
| C -0.49718854 5.74839377 -1.14254400  | H -5.50760854 4.17901577 -2.68331000  |
| H 1.54810446 5.18992177 -1.45523400   | H -4.47189454 5.57418477 -2.33930500  |
| H -2.60885454 6.03544377 -0.87127400  | H -4.06026454 4.47807077 -3.66840100  |
| H -0.24088454 6.74120777 -0.78187100  | H -2.40593954 0.92327577 1.22884300   |
| C -2.24065954 -3.70963323 -1.90455600 | C -1.01760054 0.19999077 1.89397300   |
| C -1.74156054 -2.44875523 -2.24757700 | C -0.04738854 -0.21819723 1.16193100  |
| C -2.67220054 -1.39841123 -2.37076200 | H -1.38041754 0.30661577 2.90462100   |
| C -4.04714254 -1.56092423 -2.12576900 | C 1.29994146 -0.84884623 1.21898400   |
| C -4.49315554 -2.84242723 -1.77720200 | H 1.78246646 -0.71579623 2.20144900   |
| C -3.60242854 -3.90633623 -1.67692600 | H 1.17745146 -1.93307723 1.08031400   |
| H -1.56031154 -4.54764723 -1.80025800 | C 2.21123046 -0.30705323 0.10887300   |
| H -5.54668454 -3.00333923 -1.56941000 | H 2.38496746 0.76166677 0.27973700    |

|                                      |                                       |
|--------------------------------------|---------------------------------------|
| H 1.66520646 -0.37215023 -0.83878800 | C -7.19118307 -1.01059822 -1.71106400 |
| C 3.56329846 -1.02728023 -0.03317200 | C -6.31491307 -1.21523822 -0.64358900 |
| H 3.38302346 -2.09856923 -0.19998500 | C -6.13484207 -0.23441922 0.34115000  |
| C 4.36198846 -0.44846523 -1.18099900 | C -6.86113707 0.95899778 0.22963100   |
| C 5.45376046 0.39927477 -0.95724500  | C -7.74024407 1.16999178 -0.83413200  |
| C 3.96550446 -0.68203723 -2.50696900 | H -8.59210707 0.34541778 -2.63990200  |
| C 6.12598746 1.00438977 -2.02243400  | H -7.31881107 -1.78649122 -2.46205400 |
| H 5.77331346 0.59614877 0.06372900   | H -5.75578307 -2.14598622 -0.57405300 |
| C 4.63183346 -0.08098223 -3.57487500 | H -6.73321107 1.73087378 0.98566300   |
| H 3.11772646 -1.33456723 -2.70219000 | H -8.29714707 2.10144078 -0.89876900  |
| C 5.71509546 0.76977877 -3.33556400  | C -5.12832907 -0.42851922 1.45296300  |
| H 6.96812146 1.66253877 -1.82448100  | H -5.48782707 0.04870878 2.37457300   |
| H 4.30630546 -0.27638723 -4.59368000 | H -5.01937607 -1.49875522 1.67417800  |
| H 6.23385646 1.24235277 -4.16521100  | C 0.56087593 0.73666378 -3.99967100   |
| H 4.13225646 -0.94721823 0.90188900  | C 1.82314493 0.44281178 -3.59531400   |
| <b>TS1aM</b>                         | H 0.14904993 0.93475478 -4.97654000   |
|                                      | H 2.74487893 0.33114178 -4.14392300   |
|                                      | N -0.22677907 0.75054078 -2.85419800  |
| Cu -0.24535807 0.37135278 0.00000000 | N 1.76897993 0.28887978 -2.21187000   |
| H -1.22560307 -0.80853722 0.41123900 | C 0.50595093 0.47498078 -1.73332500   |
| C -0.46360907 1.35353278 1.71626100  | C -2.00786707 -1.51720822 -3.21737600 |
| C -1.34697607 0.41936278 1.65221400  | C -2.36447907 -1.98118222 -4.64175100 |
| H -0.32396307 2.21377478 2.35915000  | C -2.52854207 -2.50207822 -2.15501900 |
| C -2.66776907 -0.07864322 2.13725200 | H -0.91690807 -1.50945522 -3.13247900 |
| H -2.60972607 -1.14831322 2.37911700 | H -1.94909507 -1.30320922 -5.39677000 |
| H -2.92573807 0.45729278 3.06278600  | H -1.96974107 -2.98675022 -4.82993700 |
| C -3.75386407 0.14966078 1.07129100  | H -3.45122607 -2.01316922 -4.78434400 |
| H -3.41959907 -0.29961022 0.12913900 | H -2.22362607 -2.17373922 -1.15628100 |
| H -3.84641707 1.22545178 0.87402500  | H -3.62214207 -2.58096622 -2.17821000 |
| C -7.90653607 0.18542678 -1.81200300 | H -2.11719807 -3.50301222 -2.33418000 |

|                                       |                                      |
|---------------------------------------|--------------------------------------|
| C 2.33824093 -2.48788222 -1.62037300  | H -0.11867707 3.09067478 -2.45416500 |
| C 1.42986393 -3.06078122 -0.51441400  | H -1.01485407 3.19120178 -0.15254300 |
| C 3.19288493 -3.58929622 -2.27125600  | H -0.50515207 4.79753178 -0.71685800 |
| H 1.68257293 -2.08403822 -2.39861100  | H -2.23005507 4.38716378 -0.65633800 |
| H 0.76663093 -2.28749922 -0.11186800  | C -1.37578707 4.57539178 -3.34385300 |
| H 0.80647493 -3.86977322 -0.91482600  | H -1.28415407 4.19697678 -4.36861400 |
| H 2.02854593 -3.46720822 0.30992200   | H -2.37495007 5.01375078 -3.23779000 |
| H 3.84234593 -3.18165822 -3.05444800  | H -0.64328107 5.37990578 -3.20825800 |
| H 3.82945893 -4.09668722 -1.53741300  | C 3.23092593 2.52615978 -1.09644800  |
| H 2.54548593 -4.34958222 -2.72348100  | H 2.46510893 2.53338478 -1.87854300  |
| C 4.25882393 -1.59721622 -0.21193400  | C 2.60384993 3.16470978 0.15800600   |
| C 3.18422393 -1.34489622 -1.07296700  | H 2.28274193 4.19110478 -0.05958900  |
| C 2.89186093 -0.00051522 -1.36242200  | H 1.73447793 2.58831878 0.49238900   |
| C 3.61334793 1.07743578 -0.82028700   | H 3.33017393 3.20363278 0.97934300   |
| C 4.67945793 0.77115378 0.03355400    | C 4.42130893 3.35003178 -1.61875100  |
| C 5.00027893 -0.55111122 0.33355100   | H 4.09533493 4.36631778 -1.86926400  |
| H 4.50988693 -2.62241922 0.04357800   | H 5.21607493 3.43572878 -0.86862000  |
| H 5.25425693 1.57757878 0.47922000    | H 4.85670793 2.89841378 -2.51780100  |
| H 5.82836493 -0.76774422 1.00337200   |                                      |
| C -3.48186907 2.48477578 -2.42619900  | <b>INT2M</b>                         |
| C -2.09794907 2.29205278 -2.52625700  |                                      |
| C -1.64471007 0.99061078 -2.80482000  | Cu -1.20026517 0.64986736 0.00000000 |
| C -2.51494307 -0.10299722 -2.96535500 | C -1.69967117 1.47199936 4.01573800  |
| C -3.88793907 0.14760678 -2.87244200  | C -2.93667117 0.97370236 3.75504300  |
| C -4.36989107 1.42584678 -2.59887700  | H -1.25563317 1.85045136 4.92251400  |
| H -3.86519107 3.47578178 -2.19968200  | H -3.79685217 0.82109236 4.38695500  |
| H -4.59319507 -0.66867922 -2.98469000 | N -0.99677517 1.42559236 2.81706300  |
| H -5.43947107 1.58392878 -2.50018100  | N -2.95083217 0.64720236 2.40272900  |
| C -1.23062507 3.98920778 -0.86997700  | C -1.75858317 0.92066036 1.80647800  |
| C -1.13996507 3.45741378 -2.31199000  | C -0.57409517 4.05063536 1.64352200  |

|                                       |                                       |
|---------------------------------------|---------------------------------------|
| C -0.59085317 4.26166036 0.11965200   | C 0.35870383 1.86816236 2.61885000    |
| C -0.51387717 5.38863636 2.39886200   | C 0.56920583 3.13224836 2.04691700    |
| H -1.51616817 3.56518736 1.91339700   | C 1.89544183 3.52504236 1.82955300    |
| H -0.66598917 3.30272236 -0.40482400  | C 2.95216283 2.68407336 2.15895200    |
| H -1.44712517 4.88086336 -0.17101000  | H 3.55139483 0.77626036 2.92453300    |
| H 0.32167983 4.76481536 -0.22049300   | H 2.09677183 4.49609236 1.38741200    |
| H -0.52695017 5.23281036 3.48345200   | H 3.97427783 2.99481336 1.97050800    |
| H 0.39557883 5.94845636 2.15273300    | C 2.19376483 -0.88072964 4.49969100   |
| H -1.37259317 6.01526436 2.13176300   | C 1.12788983 -0.40202864 3.50302400   |
| C -3.02963617 -2.23325664 2.07138600  | H 0.17180783 -0.36992164 4.03757900   |
| C -2.25204117 -2.87079964 0.90599700  | H 2.35131983 -0.15256564 5.30307700   |
| C -3.59375517 -3.30052364 3.02341600  | H 1.88065883 -1.82840164 4.95177600   |
| H -2.32033017 -1.62782364 2.64255400  | H 3.15553783 -1.05622164 4.00573200   |
| H -1.82878417 -2.10390164 0.24849300  | C 0.97962383 -1.41086164 2.34804200   |
| H -1.43080617 -3.48731164 1.28917300  | H 0.21665583 -1.09540364 1.63071700   |
| H -2.90427217 -3.51198764 0.30160300  | H 1.92529483 -1.50470364 1.80615600   |
| H -4.12771617 -2.84255164 3.86367700  | H 0.70307583 -2.39827664 2.73739800   |
| H -4.29121017 -3.97082864 2.50864200  | C -4.86738517 2.45973636 1.24532900   |
| H -2.78113517 -3.91466864 3.42748200  | H -4.17158317 2.67809436 2.06193000   |
| C -5.20734817 -1.84124464 0.83418600  | C -4.23532617 2.99477636 -0.05411800  |
| C -4.12066417 -1.31538964 1.54232100  | H -4.05112917 4.07289536 0.02355700   |
| C -4.06654517 0.07851936 1.69617800   | H -3.28435617 2.49573336 -0.26755900  |
| C -5.02729117 0.94963036 1.15481800   | H -4.90159217 2.82157836 -0.90727900  |
| C -6.09308217 0.37544436 0.45551800   | C -6.18272417 3.18512836 1.56447800   |
| C -6.18497617 -1.00654864 0.30059500  | H -5.99350317 4.25382436 1.71445700   |
| H -5.28018017 -2.91499764 0.69140300  | H -6.90678717 3.09540736 0.74719800   |
| H -6.85198217 1.01491536 0.01652600   | H -6.64876717 2.78824636 2.47313500   |
| H -7.01919217 -1.43350464 -0.24896700 | H -2.30080417 -0.55455964 -2.56410000 |
| C 2.71202383 1.42727136 2.71154700    | C -1.25995617 -0.26929464 -2.71573300 |
| C 1.40736883 0.99239536 2.95818000    | C -0.52799417 0.32870536 -1.75701500  |

|                                       |                                       |
|---------------------------------------|---------------------------------------|
| H -0.85537717 -0.50116264 -3.70926000 | H -4.22044198 1.45545102 -2.13824913  |
| C 0.91651083 0.68198336 -2.07174500   | H -3.85661298 -0.26079498 -2.34948513 |
| H 1.22972983 0.25317436 -3.04004100   | C -5.05308198 0.19513102 -0.59808913  |
| H 1.01665383 1.77501736 -2.17035200   | H -5.10713798 0.97380102 0.17620687   |
| C 1.88522183 0.22185936 -0.97250600   | H -4.79796298 -0.73660398 -0.07577813 |
| H 1.70128783 -0.83923864 -0.76198000  | C -9.45651998 -0.93169598 1.68884887  |
| H 1.66052483 0.75874636 -0.04280200   | C -9.21072998 0.40080702 1.35023487   |
| C 3.36722883 0.42499136 -1.32845300   | C -8.25040598 0.71294302 0.38621487   |
| H 3.53004683 1.46902636 -1.62524400   | C -7.51890798 -0.29446398 -0.25782213 |
| C 4.30627383 0.08151636 -0.19273100   | C -7.77564998 -1.62739198 0.09281487  |
| C 4.26832183 -1.17945864 0.42020600   | C -8.73435598 -1.94614298 1.05571387  |
| C 5.22191683 1.02028936 0.29688300    | H -10.20603098 -1.17763798 2.43660787 |
| C 5.09454083 -1.48092664 1.50291000   | H -9.76992098 1.19796102 1.83410087   |
| H 3.58018283 -1.93261064 0.04646400   | H -8.06457598 1.75295002 0.12516887   |
| C 6.05632283 0.72541436 1.37687400    | H -7.21638598 -2.42174398 -0.39739613 |
| H 5.27223883 2.00041236 -0.17117300   | H -8.92023698 -2.98692798 1.30944687  |
| C 5.98940583 -0.52558264 1.99229100   | C -6.43815598 0.04779602 -1.25822613  |
| H 5.04241183 -2.46420564 1.96310000   | H -6.38310698 -0.73129198 -2.03058513 |
| H 6.75631083 1.47403236 1.73906900    | H -6.68937298 0.98355102 -1.77575313  |
| H 6.63432683 -0.75856364 2.83497000   | C 3.21118502 0.70042702 2.66131687    |
| H 3.60850683 -0.18618664 -2.21013900  | C 2.48772602 1.82140402 2.91934187    |
|                                       | H 4.12022602 0.31731602 3.09737487    |
| <b>INT2aM</b>                         | H 2.63410602 2.62203502 3.62699987    |
|                                       | N 2.54688702 0.03045002 1.63907687    |
| Cu 0.04683802 0.24762002 -0.00446813  | N 1.40656202 1.79931702 2.04725687    |
| H -2.58136098 1.56316502 -0.20665113  | C 1.42559502 0.69584502 1.24609087    |
| C -1.50438998 -0.05054998 -1.05118013 | C 1.43026102 -2.37866098 2.80023587   |
| C -2.60060698 0.72461302 -0.91210713  | C 1.85713702 -3.29507298 3.96014087   |
| H -1.61990198 -0.87281898 -1.77315813 | C 0.01483902 -2.72674698 2.29869587   |
| C -3.93361298 0.53778502 -1.59774413  | H 1.39229902 -1.35745698 3.19283587   |

|                                      |                                      |
|--------------------------------------|--------------------------------------|
| H 2.86204802 -3.04382298 4.31848287  | C 3.65998402 -3.65609898 -0.03527313 |
| H 1.15828602 -3.19177298 4.79819887  | H 4.79891902 -2.51215998 -1.45175013 |
| H 1.86049002 -4.35018998 3.66390687  | H 2.41231302 -4.55417498 1.46490987  |
| H -0.30538198 -2.03592098 1.51064587 | H 3.94015502 -4.60986698 -0.47448013 |
| H -0.01584998 -3.74457098 1.89159087 | C 3.37448102 0.37082302 -1.92322713  |
| H -0.70754398 -2.66600498 3.12140187 | C 4.25277002 0.07043202 -0.69152713  |
| C -1.00432398 1.32935702 3.60528087  | H 4.09637602 0.88304402 0.02607087   |
| C -2.12834998 0.44611202 3.02935887  | H 2.31405902 0.41231002 -1.65087313  |
| C -1.26589998 1.68992502 5.07847887  | H 3.65355602 1.33297302 -2.36915613  |
| H -0.08258398 0.74008302 3.57327487  | H 3.49745502 -0.40914298 -2.68425813 |
| H -1.92712098 0.17999102 1.98615187  | C 5.74617402 0.06947902 -1.05807613  |
| H -2.22010598 -0.47826398 3.61226987 | H 6.37227602 -0.16360198 -0.18934613 |
| H -3.09436598 0.96361002 3.06353487  | H 5.97316202 -0.66098898 -1.84284513 |
| H -0.44989898 2.29362202 5.49263787  | H 6.03877102 1.05510702 -1.43769413  |
| H -2.19556898 2.25888702 5.19380187  | C 1.73207402 4.01002602 0.20709087   |
| H -1.35875098 0.77881102 5.68099987  | H 2.49324802 3.30042302 0.54761087   |
| C -1.82469798 3.52727802 2.64110587  | C 1.34946602 3.61598502 -1.23380613  |
| C -0.80732098 2.57090502 2.74466887  | H 2.23050402 3.64026902 -1.88650613  |
| C 0.35633002 2.78416702 1.98502787   | H 0.92099702 2.60800002 -1.26518113  |
| C 0.51628102 3.87734002 1.11548987   | H 0.60304502 4.30916502 -1.63965413  |
| C -0.53106698 4.80283302 1.04706787  | C 2.36153702 5.41239402 0.25903987   |
| C -1.68713198 4.63385102 1.80658487  | H 3.27145602 5.43968502 -0.35160213  |
| H -2.74112098 3.39192702 3.20790487  | H 1.68208002 6.17765402 -0.13296413  |
| H -0.44891398 5.65305102 0.37697487  | H 2.62797402 5.69309002 1.28446287   |
| H -2.49171498 5.36087802 1.73554787  |                                      |
| C 4.14930402 -2.47144798 -0.58296813 | <b>R2</b>                            |
| C 3.79898402 -1.23003798 -0.03996113 |                                      |
| C 2.94568002 -1.23366698 1.07755087  | C -1.05437659 0.23872679 0.00000000  |
| C 2.42254302 -2.40893598 1.64404487  | H -1.00518759 0.87357479 0.90069900  |
| C 2.80293202 -3.62439498 1.06226987  | H -0.21009059 0.48592179 -0.65002700 |



|                                        |                                      |
|----------------------------------------|--------------------------------------|
| C -1.95652959 -1.55665621 1.20434400   | H -0.85095178 1.99814541 -1.00675094 |
| H -1.77233959 -2.61153621 1.42901900   | H -0.95198278 0.52951541 -1.98235294 |
| H -1.94393559 -0.98544921 2.14875200   | C 1.97887222 1.87925441 -0.97283594  |
| C -2.37663859 0.47953579 -0.72557800   | H 2.95608522 1.88717341 -1.45657894  |
| H -2.37757459 -0.06943621 -1.67826100  | H 1.74298722 2.91220341 -0.68938294  |
| H -2.53491259 1.53856879 -0.93071100   | N 0.95486122 1.36603541 -1.89175694  |
| C -3.32345659 -1.38995021 0.53252800   | C 0.93704822 1.59576941 -3.25155494  |
| H -4.11260859 -1.68463721 1.22360600   | C 2.24506222 1.99275641 -3.93414794  |
| H -3.38801259 -2.04867221 -0.34470800  | O -0.07857278 1.43180041 -3.92062894 |
| N -3.48621459 -0.00048421 0.10454700   | O 0.78174222 0.86648441 0.89937806   |
| C -4.61377659 0.77138979 0.20513300    | C 2.19436922 1.78404841 -5.43477894  |
| C -5.79543059 0.22312579 1.01425900    | H 2.02755422 0.72093041 -5.64655394  |
| O -4.69452659 1.89139979 -0.28857400   | H 1.36894222 2.34692441 -5.87398394  |
| Br -6.74295559 -1.19403921 -0.14008600 | H 3.13593222 2.09662841 -5.89417294  |
| O -0.90366159 -1.13100221 0.35553000   | H 3.10105622 1.47962041 -3.49235294  |
| C -6.79040759 1.30101779 1.38530500    | Cu 2.16868122 7.62560441 -1.87143894 |
| H -6.29062959 2.02859979 2.03666100    | H 4.55297222 5.84597641 -1.28860294  |
| H -7.13389759 1.83091179 0.49582600    | C 3.73285622 7.08369441 -2.79546494  |
| H -7.64255859 0.87238279 1.91826400    | C 4.68061422 6.26292041 -2.29347794  |
| H -5.47997259 -0.34965721 1.88620100   | H 3.94823722 7.43750741 -3.81573194  |
|                                        | C 5.95237922 5.82421441 -2.97715594  |
| <b>IM1</b>                             | H 5.95761822 4.72587941 -3.07866794  |
|                                        | H 5.98369922 6.23244941 -3.99725094  |
| C -0.12713178 0.23427041 0.00332906    | C 7.21709922 6.24868541 -2.21092194  |
| H 0.24580422 -0.76903659 -0.26169494   | H 7.17080122 5.86722541 -1.18083094  |
| H -1.07295978 0.12440941 0.54199406    | H 7.24490322 7.34349241 -2.12993994  |
| C 2.05375622 1.00934841 0.28046406     | C 11.99146522 6.99613841 -0.60224794 |
| H 2.71096322 1.48235641 1.01550306     | C 11.38506822 5.76500441 -0.34274094 |
| H 2.46080222 0.01578641 0.02769306     | C 10.27652222 5.35956241 -1.08797894 |
| C -0.33382778 1.06325441 -1.25919794   | C 9.75272822 6.17068741 -2.10403494  |

|                                       |                                       |
|---------------------------------------|---------------------------------------|
| C 10.37088622 7.40407741 -2.35277694  | H 1.95389822 8.70291141 1.49401706    |
| C 11.47956322 7.81538641 -1.61119294  | H 3.84329422 7.58782341 0.33356606    |
| H 12.85684222 7.31288241 -0.02591594  | H 4.42101722 8.72747541 1.56393606    |
| H 11.77793822 5.11797241 0.43778706   | H 4.45748222 6.98371241 1.88567806    |
| H 9.80918322 4.39844841 -0.88270394   | H 1.49457322 8.31738741 3.92223106    |
| H 9.97693322 8.04600841 -3.13813494   | H 3.04018522 7.46694041 4.08164606    |
| H 11.94615422 8.77421041 -1.82351394  | H 3.02226622 9.18412341 3.65771406    |
| C 8.51877222 5.75291941 -2.87133294   | C 2.08302722 5.39319941 2.33818406    |
| H 8.56716122 6.14101941 -3.89766394   | C 1.68008822 6.59967541 1.74931606    |
| H 8.48256722 4.65801041 -2.95332794   | C 0.55617722 6.55884341 0.90737206    |
| C -1.01844778 9.61760141 -0.13863594  | C -0.15128078 5.37581241 0.62044806   |
| C -0.90812578 8.59142441 0.74473006   | C 0.28575022 4.20111841 1.24182606    |
| H -1.67879678 10.46979641 -0.16923694 | C 1.38982622 4.21096941 2.09414106    |
| H -1.45394978 8.35855341 1.64535206   | H 2.95129822 5.38412941 2.99057806    |
| N -0.05171678 9.40093441 -1.11306494  | H -0.20963678 3.25680941 1.05016906   |
| N 0.11919722 7.77855541 0.27786606    | H 1.70685122 3.28233041 2.56106106    |
| C 0.66450222 8.26711341 -0.87174894   | C -0.11695078 10.81459741 -4.54325494 |
| C 1.85551922 11.54610641 -0.74845094  | C -0.40566678 9.96984541 -3.46469594  |
| C 1.77348422 13.00124741 -0.25600794  | C 0.20815122 10.26500341 -2.23520994  |
| C 3.31876522 11.08087541 -0.89066894  | C 1.11010922 11.32940441 -2.05985994  |
| H 1.38962622 10.91890241 0.01847806   | C 1.36459622 12.14299741 -3.16976694  |
| H 0.73306522 13.33094841 -0.15481994  | C 0.75230422 11.89319141 -4.39641294  |
| H 2.26004922 13.09598741 0.72151806   | H -0.56465978 10.61426041 -5.51204794 |
| H 2.27900622 13.69103441 -0.94135194  | H 2.06313722 12.96914441 -3.07773494  |
| H 3.37148122 10.03337241 -1.20814894  | H 0.96637822 12.53430341 -5.24742594  |
| H 3.84832822 11.68540041 -1.63676794  | C -0.53950278 7.68252841 -4.49190994  |
| H 3.84625222 11.17987141 0.06595306   | C -1.28578778 8.74101741 -3.65554494  |
| C 2.46354222 7.88094841 2.00604206    | H -1.47756078 8.30059641 -2.67182594  |
| C 3.88060222 7.78588741 1.40996706    | H 0.41969922 7.42176641 -4.03062094   |
| C 2.50453522 8.23001641 3.50514206    | H -1.13783878 6.76817741 -4.57740494  |

|                                       |                                       |
|---------------------------------------|---------------------------------------|
| H -0.33737278 8.05568141 -5.50295094  | H 2.56097632 1.61648443 -0.85811459   |
| C -2.65093778 9.08804941 -4.27424994  | N 0.62092532 1.94643343 -1.62008459   |
| H -3.18407278 9.83326341 -3.67269694  | C 0.53085632 3.11450443 -2.37695359   |
| H -2.54638178 9.48828041 -5.28922094  | C 1.26578532 3.18082343 -3.64486659   |
| H -3.27453778 8.18892741 -4.33878894  | O -0.21379768 4.03819943 -2.02167059  |
| C -1.27913278 5.36008341 -0.40519294  | O 0.80237432 -0.25054057 0.17273541   |
| H -1.68477778 6.37459541 -0.48185694  | C 0.99009932 4.33107043 -4.55617859   |
| C -0.71087178 4.99517941 -1.79258794  | H 0.02029532 4.19148443 -5.06110259   |
| H -1.50001478 5.01996041 -2.55339494  | H 0.92529332 5.26354243 -3.99030059   |
| H 0.08004722 5.69007941 -2.09168994   | H 1.76452532 4.42047143 -5.32319559   |
| H -0.27483078 3.99150841 -1.79195394  | H 1.62174932 2.25712943 -4.08925859   |
| C -2.44900478 4.44547041 -0.00969294  | Cu 5.43219832 4.55416843 -1.41891759  |
| H -3.25815278 4.53675641 -0.74282294  | H 6.98640032 2.22418243 -2.69422759   |
| H -2.15727878 3.39044141 0.02039506   | C 6.96346932 4.32263643 -2.58921359   |
| H -2.84613278 4.70934041 0.97716906   | C 7.52346232 3.15076643 -2.90704459   |
| Br 2.63388222 3.96460541 -3.53168594  | H 7.47227432 5.26000543 -2.84801059   |
|                                       | C 8.91732532 2.97468543 -3.46587759   |
| <b>TS2</b>                            | H 8.89002232 2.38049843 -4.39249659   |
|                                       | H 9.33461032 3.95605643 -3.73124759   |
| C -0.42098168 0.46198843 0.02153641   | C 9.84367132 2.28156043 -2.45093059   |
| H -1.05876368 -0.04121457 -0.72461359 | H 9.47697132 1.26674443 -2.24540659   |
| H -0.92451368 0.42494743 0.99271141   | H 9.79472132 2.82111443 -1.49737959   |
| C 1.52204632 -0.26638457 -1.05526559  | C 13.73461732 0.57703943 0.29499041   |
| H 2.44899032 -0.81561757 -0.86519759  | C 13.17751632 -0.27046757 -0.66527559 |
| H 0.93983732 -0.80501057 -1.82203659  | C 12.41638032 0.25805043 -1.70959759  |
| C -0.18188468 1.90851443 -0.39853559  | C 12.19868432 1.63809843 -1.81576559  |
| H 0.32815932 2.44812243 0.41039441    | C 12.76395132 2.47766543 -0.84515659  |
| H -1.12689868 2.42005943 -0.58903259  | C 13.52534232 1.95507243 0.20133741   |
| C 1.84598432 1.14378943 -1.54454559   | H 14.32987732 0.16778043 1.10694841   |
| H 2.32582332 1.08721143 -2.52203859   | H 13.33834032 -1.34382657 -0.60335659 |

|                                       |                                      |
|---------------------------------------|--------------------------------------|
| H 11.98493732 -0.40695357 -2.45497859 | H 7.36385432 3.32977943 2.96217841   |
| H 12.60650132 3.55223043 -0.91634759  | H 7.53594732 1.56794943 3.06901541   |
| H 13.95935632 2.62352943 0.94085841   | H 8.73360032 2.52656643 2.17529241   |
| C 11.31451532 2.20736643 -2.90201059  | C 4.69924932 0.93079843 1.50828541   |
| H 11.65556232 3.21694343 -3.16817159  | C 5.35455332 2.16655143 1.42143241   |
| H 11.38817932 1.59988343 -3.81363259  | C 4.57613732 3.31749043 1.65033141   |
| C 6.15656532 6.50181643 2.21282941    | C 3.19364132 3.28095843 1.92016941   |
| C 5.58566832 5.36794643 2.69634541    | C 2.60007132 2.01806743 2.01392241   |
| H 6.57330632 7.36257043 2.71048641    | C 3.34241932 0.85639343 1.81106041   |
| H 5.40020332 5.03265943 3.70448041    | H 5.25458932 0.01595243 1.33367441   |
| N 6.12870832 6.39432543 0.82767041    | H 1.54219832 1.93005043 2.22763141   |
| N 5.22105432 4.60642943 1.59059741    | H 2.83956332 -0.10419257 1.85316941  |
| C 5.54673732 5.23143543 0.42761641    | C 6.38001132 9.14160743 -1.65404459  |
| C 8.97775132 6.28958543 0.34210841    | C 5.81342232 8.24603943 -0.73790559  |
| C 9.72832632 6.95160843 1.51397041    | C 6.68381132 7.34785143 -0.09741559  |
| C 9.96298832 5.61501943 -0.62726559   | C 8.06773932 7.29806343 -0.35150459  |
| H 8.34742032 5.49463143 0.75428141    | C 8.58359532 8.22612243 -1.26242859  |
| H 9.03452732 7.38004143 2.24583041    | C 7.74908232 9.13785643 -1.90780359  |
| H 10.35858532 6.21859543 2.03098741   | H 5.73820832 9.84394243 -2.17737259  |
| H 10.37361432 7.76108843 1.15208641   | H 9.64706832 8.22825543 -1.47999559  |
| H 9.43100332 5.16396043 -1.46851959   | H 8.16892932 9.84334543 -2.61981559  |
| H 10.70150132 6.32279743 -1.02170359  | C 3.54743432 7.76845143 -1.74132159  |
| H 10.51436932 4.82338043 -0.10651659  | C 4.30992632 8.24439643 -0.48993159  |
| C 6.84812132 2.25863443 1.11380441    | H 4.09417432 7.53154643 0.31147541   |
| C 7.38055732 1.06805543 0.30372541    | H 3.87649532 6.77400243 -2.05975259  |
| C 7.66632132 2.43451443 2.40951941    | H 2.47247832 7.71465743 -1.53483159  |
| H 7.00757232 3.14787143 0.49453441    | H 3.69966532 8.45772643 -2.58051859  |
| H 6.78411532 0.90416443 -0.59963759   | C 3.80775332 9.62203743 -0.02055659  |
| H 8.41131432 1.26717143 -0.00511159   | H 4.33817932 9.95525143 0.87891941   |
| H 7.38662232 0.14118243 0.88960841    | H 3.94466132 10.38670143 -0.79382059 |

|                                       |                                       |
|---------------------------------------|---------------------------------------|
| H 2.73735932 9.57322943 0.20977941    | O -5.57103300 -0.86105000 -1.98572000 |
| C 2.38008332 4.56889443 2.02770341    | O -4.09444800 -4.47859200 1.02854600  |
| H 3.00850332 5.32041443 2.52054141    | C -4.01117600 -0.59725300 -4.32029000 |
| C 2.03317932 5.11643643 0.62391441    | H -4.78656900 -1.03697900 -4.97106100 |
| H 1.58387132 6.11339043 0.71041541    | H -4.41855600 0.33290400 -3.91877500  |
| H 2.91804632 5.19517543 -0.01356559   | H -3.13148400 -0.39031400 -4.93616500 |
| H 1.31282132 4.47763443 0.10415041    | H -3.06540800 -2.40422300 -3.46789900 |
| C 1.10914132 4.42642243 2.87885741    | Cu 0.12229500 0.66319500 -0.73287000  |
| H 0.65084532 5.41064443 3.02492641    | H 1.42754400 -1.99320200 -1.43856900  |
| H 0.36000432 3.79502343 2.38822941    | C 1.43933000 0.04535300 -1.96214000   |
| H 1.32526732 3.99743043 3.86400441    | C 1.93945000 -1.20021200 -1.98969000  |
| Br 3.78974032 3.75953643 -2.95467759  | H 1.94898700 0.80618600 -2.57209000   |
|                                       | C 3.23786900 -1.61653800 -2.63866100  |
| <b>F-TS2</b>                          | H 3.09646000 -2.53053900 -3.23702900  |
|                                       | H 3.58068100 -0.83160100 -3.32712100  |
| C -5.37467300 -3.93836000 0.72297200  | C 4.32588000 -1.87658000 -1.57983300  |
| H -5.92949900 -4.63363300 0.07153900  | H 3.97776600 -2.64165800 -0.87158800  |
| H -5.90672500 -3.85232200 1.67597500  | H 4.47345500 -0.96174900 -0.99079500  |
| C -3.30346400 -4.59449100 -0.14690000 | C 8.59455200 -2.87089100 0.97629600   |
| H -2.33258900 -4.98790400 0.16993800  | C 7.92566200 -3.97274900 0.43871500   |
| H -3.76813600 -5.31155100 -0.84452100 | C 6.99855700 -3.79605300 -0.59092400  |
| C -5.27689300 -2.57086400 0.05482600  | C 6.72373200 -2.52105900 -1.10310300  |
| H -4.86246300 -1.84401200 0.76451200  | C 7.40213400 -1.42306400 -0.55321600  |
| H -6.26158800 -2.21615200 -0.25125200 | C 8.32903600 -1.59298900 0.47593600   |
| C -3.11159200 -3.24469500 -0.83493300 | H 9.31875300 -3.00634700 1.77548600   |
| H -2.53535100 -3.38370000 -1.75031200 | H 8.12721500 -4.97165300 0.81855600   |
| H -2.53042400 -2.58309300 -0.17883300 | H 6.48086100 -4.65879700 -1.00598500  |
| N -4.41424600 -2.63786400 -1.12654200 | H 7.19904000 -0.42574200 -0.93977400  |
| C -4.61183500 -1.63781700 -2.07656300 | H 8.84764900 -0.72896400 0.88502700   |
| C -3.68701500 -1.54956000 -3.22414700 | C 5.67638700 -2.31715900 -2.17486000  |

|                                      |                                      |
|--------------------------------------|--------------------------------------|
| H 6.01554900 -1.55516200 -2.89024700 | C -0.42363700 -1.24080200 2.41841000 |
| H 5.53656000 -3.24390200 -2.74708400 | C -1.35495400 -0.18658600 2.33975800 |
| C -0.22069400 3.21863500 2.52375900  | C -2.74449300 -0.36348900 2.49994800 |
| C -0.77805600 2.12482900 3.10346900  | C -3.18616400 -1.65672900 2.79738700 |
| H 0.02997000 4.19021300 2.91743400   | C -2.29437200 -2.72453000 2.88090900 |
| H -1.12090100 1.94306300 4.10966500  | H -0.25497200 -3.36439100 2.74221800 |
| N 0.02158100 2.87522700 1.19993500   | H -4.24181200 -1.84406500 2.95344300 |
| N -0.86239100 1.14927900 2.11334400  | H -2.67613400 -3.72270000 3.06457300 |
| C -0.36906200 1.59887200 0.92677800  | C 0.73896100 5.20870600 -1.59523400  |
| C 2.91378400 2.69772600 1.20606000   | C 0.00931500 4.47031900 -0.65560000  |
| C 3.79556800 3.53352200 2.15206200   | C 0.74072600 3.68169700 0.24824300   |
| C 3.73654900 1.63063500 0.46089600   | C 2.14531200 3.59129000 0.23711800   |
| H 2.19073200 2.16032300 1.82685300   | C 2.82618100 4.35407900 -0.71888400  |
| H 3.19764000 4.25955400 2.71562600   | C 2.13139400 5.15443400 -1.62461800  |
| H 4.30887600 2.88208700 2.86937900   | H 0.20983900 5.82222900 -2.31840000  |
| H 4.56043700 4.08953800 1.59680100   | H 3.91089500 4.31098200 -0.76139200  |
| H 3.09188200 1.01690000 -0.17556500  | H 2.67855700 5.73358100 -2.36401400  |
| H 4.50843600 2.08714200 -0.17065300  | C -2.04790000 3.68532100 -1.87154700 |
| H 4.24073500 0.97191300 1.17928700   | C -1.51378400 4.48000800 -0.66335300 |
| C 1.07930600 -1.00595300 2.27392100  | H -1.86056500 3.96818300 0.24049300  |
| C 1.84148400 -2.22411300 1.73232400  | H -1.66757200 2.65879500 -1.87353300 |
| C 1.68778700 -0.53261300 3.60896000  | H -3.14313400 3.63962700 -1.84488000 |
| H 1.22893300 -0.20571000 1.54342800  | H -1.74800400 4.16040700 -2.81347900 |
| H 1.37418900 -2.60859700 0.82076800  | C -2.08954200 5.90710900 -0.62951200 |
| H 2.86848300 -1.93445800 1.48491600  | H -1.70129700 6.47446400 0.22437900  |
| H 1.89537300 -3.03786000 2.46558700  | H -1.84812200 6.46503800 -1.54195300 |
| H 1.21478700 0.38903600 3.96370600   | H -3.18190500 5.86959800 -0.54837500 |
| H 1.56447900 -1.29885200 4.38414000  | C -3.71761000 0.80002500 2.30531800  |
| H 2.76063000 -0.33769400 3.48869700  | H -3.27347600 1.68848900 2.77332700  |
| C -0.93251600 -2.51960400 2.68281400 | C -3.90590600 1.12815700 0.80619100  |

H -4.50954300 2.03798300 0.69941900  
H -2.95267400 1.28477200 0.29650500  
H -4.42688400 0.32341000 0.27800400  
C -5.08247000 0.58296900 2.97873400  
H -5.67611600 1.50084200 2.90978000  
H -5.65842700 -0.20792500 2.48506100  
H -4.97896600 0.32072000 4.03794700  
Br -1.65886500 -0.38766100 -1.92184100

### INT3a

Br -0.74933682 0.57029177 0.00000000  
Cu -2.76390082 0.35182777 -1.17993400  
H -5.32720082 -1.12571523 -1.44257000  
C -4.49676382 0.38716477 -0.27180500  
C -5.49522582 -0.42448623 -0.62502600  
H -4.61611582 1.11909777 0.53400200  
C -6.89919182 -0.43701423 -0.06592500  
H -7.11158182 -1.39590923 0.43200600  
H -7.00521682 0.34659777 0.69604300  
C -7.92521882 -0.22087223 -1.19130200  
H -7.85031082 -1.03813623 -1.91999000  
H -7.67206882 0.69123977 -1.74191900  
C -11.89957782 0.72882877 -4.13043900  
C -11.75478582 -0.58260723 -3.67345700  
C -10.96490382 -0.85209323 -2.55346800  
C -10.30956882 0.17971777 -1.86994600  
C -10.46488382 1.49288177 -2.33831200  
C -11.25128982 1.76808377 -3.45782700  
H -12.51550482 0.94046977 -5.00036700

H -12.25921682 -1.39710523 -4.18724200  
H -10.85518982 -1.87630523 -2.20254300  
H -9.96391682 2.30588677 -1.81615500  
H -11.36177582 2.79323577 -3.80208600  
C -9.38342682 -0.11269723 -0.71103400  
H -9.45529582 0.68609877 0.03939100  
H -9.67684082 -1.04423223 -0.20985600  
C -4.04813482 -0.58619323 -5.07233000  
C -4.17251282 0.76438277 -5.09090200  
H -4.24823182 -1.33156323 -5.82380700  
H -4.49522782 1.44339977 -5.86353300  
N -3.56090782 -0.92670923 -3.81126300  
N -3.75599282 1.21792877 -3.84398900  
C -3.37229582 0.18548977 -3.04830100  
C -0.71589882 -1.49366223 -3.52499800  
C -0.48428382 -1.39063423 -5.04706500  
C 0.60861918 -1.74415023 -2.79158200  
H -1.07017082 -0.52136423 -3.17469900  
H -1.40230982 -1.12905323 -5.58376300  
H 0.26390318 -0.61939723 -5.26471500  
H -0.11748182 -2.34370523 -5.44676400  
H 0.45103918 -1.84203923 -1.71363500  
H 1.12508918 -2.63683423 -3.16501500  
H 1.27374218 -0.88902223 -2.95010200  
C -1.15204182 2.31066377 -4.48618600  
C 0.11365318 2.25870777 -3.61146500  
C -0.83828582 2.83070377 -5.90164000  
H -1.50642382 1.28308477 -4.59670200  
H -0.10638182 1.86612477 -2.61378100  
H 0.86491418 1.61063877 -4.07901000

H 0.56073418 3.25265777 -3.49399700  
H -1.73368482 2.82899377 -6.53433000  
H -0.45073182 3.85569677 -5.87249000  
H -0.08053882 2.19850077 -6.37908700  
C -2.03227682 4.48659177 -3.53422100  
C -2.25453582 3.13719277 -3.83447600  
C -3.51960782 2.60642077 -3.52115800  
C -4.54336682 3.35887077 -2.91634900  
C -4.26818982 4.70388977 -2.64414500  
C -3.02817382 5.26244077 -2.94904500  
H -1.06609682 4.92852577 -3.75823400  
H -5.02914282 5.32233877 -2.18040200  
H -2.83678282 6.30776577 -2.72206300  
C -3.75986082 -4.52451723 -2.86340100  
C -4.17457382 -3.23950223 -3.23881200  
C -3.17553482 -2.26165523 -3.41160400  
C -1.79835682 -2.53160123 -3.22892700  
C -1.45086082 -3.82657223 -2.83112200  
C -2.41749882 -4.81345923 -2.65052100  
H -4.50124882 -5.30541223 -2.72875600  
H -0.40841682 -4.07093823 -2.66428000  
H -2.11944682 -5.81281723 -2.34530100  
C -6.55591382 -3.54301523 -2.37156800  
C -5.65771082 -2.97538623 -3.48730300  
H -5.81862182 -1.89234823 -3.51682600  
H -6.25255482 -3.18083023 -1.38514600  
H -7.59621882 -3.24518323 -2.54375600  
H -6.53194282 -4.63801823 -2.35139600  
C -6.09096482 -3.55674523 -4.84926400  
H -5.49658182 -3.15546023 -5.67700000

H -5.96909382 -4.64619423 -4.85761200  
H -7.14522482 -3.33019323 -5.04630700  
C -5.90161782 2.74728977 -2.59760000  
H -5.75289882 1.67224777 -2.46450900  
C -6.49465782 3.27743577 -1.28260200  
H -7.40960382 2.72846877 -1.03608900  
H -5.79007682 3.14867477 -0.45533400  
H -6.76335282 4.33787977 -1.34871300  
C -6.88537582 2.95493777 -3.76646700  
H -7.84985882 2.48035177 -3.54920900  
H -7.06116682 4.02332277 -3.94205300  
H -6.49966182 2.52142377 -4.69607000

**INT3b**

C -0.61671083 0.29177718 0.00000000  
H -0.08611783 0.42000518 -0.95759000  
H -1.43614483 1.01517218 0.05016600  
C -0.24315083 -2.02961382 0.01333000  
H -0.78633283 -2.97817882 0.07733000  
H 0.30305217 -1.99754382 -0.94567400  
C 0.36685817 0.49315418 1.15439900  
H -0.17813483 0.44688018 2.10638300  
H 0.87893517 1.45199018 1.07282400  
C 0.76285217 -1.90155082 1.16607800  
H 1.51959617 -2.68266582 1.08318800  
H 0.23629917 -2.03465482 2.12048700  
N 1.37155317 -0.57207382 1.14764100  
C 2.63540217 -0.27803882 0.64167900  
C 3.64551617 -1.33294982 0.65620500



|                                       |                                       |
|---------------------------------------|---------------------------------------|
| O 2.91705317 0.86369618 0.25128100    | H -11.20001800 1.36551193 0.46280700  |
| O -1.21814183 -1.00026082 0.06382700  | H -9.60276300 -1.78067007 2.90873000  |
| C 4.98433917 -1.10291982 0.05235700   | H -10.88000000 -0.92880607 4.84996500 |
| H 5.23859817 -1.89735782 -0.66469400  | C -9.45320600 -0.73833707 0.39269500  |
| H 5.01485517 -0.13452482 -0.45138500  | H -9.28766200 -1.82153907 0.46899700  |
| H 5.77263717 -1.12085982 0.82076500   | H -9.96600500 -0.56511207 -0.56254000 |
| H 3.47128717 -2.26341882 1.18729500   | C -2.47881300 -1.93850107 -0.99867200 |
|                                       | C -1.79289500 -0.67061107 -1.44946500 |
| <b>TS3</b>                            | H -0.72146400 -0.78879107 -1.58574100 |
|                                       | C -2.50356300 0.10659793 -2.50950900  |
| Br -0.90848800 1.25994693 0.00000000  | H -3.53482600 0.30259893 -2.20834200  |
| Cu -3.16838500 0.37539093 0.93444800  | H -1.97683300 1.03457993 -2.73456100  |
| H -5.66900800 1.13159293 -0.72433200  | H -2.53451600 -0.51857107 -3.41332700 |
| C -4.69724300 -0.51329607 0.17313200  | O -3.34503600 -2.37514207 -1.75914500 |
| C -5.73386800 0.07961893 -0.44273000  | C -3.82959500 2.61693893 4.43936500   |
| H -4.85374300 -1.57145007 0.42329000  | C -3.86967900 1.36985593 4.96687700   |
| C -7.09027600 -0.55110007 -0.66483700 | H -4.01966300 3.58426593 4.87536400   |
| H -7.47954600 -0.34601907 -1.67377400 | H -4.08401100 1.02048893 5.96424600   |
| H -7.00806900 -1.64249807 -0.56808500 | N -3.46799300 2.47128293 3.10213600   |
| C -8.08851500 -0.02316007 0.38487100  | N -3.53653300 0.49503193 3.93549800   |
| H -8.25043400 1.05398793 0.23936700   | C -3.27335400 1.16074893 2.76950800   |
| H -7.63253800 -0.12193107 1.37791900  | C -0.83609600 3.64968993 3.30175300   |
| C -11.76562500 0.70690093 3.75546800  | C -0.81252300 4.48640793 4.59688900   |
| C -11.85322600 1.34567793 2.51641300  | C 0.56832000 3.59616093 2.67657600    |
| C -11.12904400 0.86217093 1.42493400  | H -1.10288100 2.62308493 3.56809400   |
| C -10.30724800 -0.26617707 1.54738200 | H -1.78582300 4.48542093 5.09805700   |
| C -10.23147600 -0.89986007 2.79641800 | H -0.06957700 4.08798093 5.29835100   |
| C -10.95159500 -0.42003007 3.89184000 | H -0.54859600 5.52805993 4.37805700   |
| H -12.32967500 1.08132593 4.60562300  | H 0.56349300 3.02248493 1.74571800    |
| H -12.48777000 2.22056493 2.39860800  | H 0.96136200 4.59718093 2.46508600    |

|                                      |                                       |
|--------------------------------------|---------------------------------------|
| H 1.26453300 3.11564693 3.37388600   | C -5.53105700 3.37958493 1.25843600   |
| C -0.91472700 -0.19025107 4.89996700 | H -5.36820900 2.29675593 1.31671100   |
| C 0.04774600 -0.04884007 3.70544200  | H -5.60777900 3.44668893 -0.93243000  |
| C -0.14193500 -0.46112207 6.20227700 | H -7.14055100 3.03261993 -0.14635700  |
| H -1.41407400 0.77500493 5.02677300  | H -6.57800500 4.70530693 -0.14041400  |
| H -0.48523900 0.22694193 2.79119300  | C -6.45130400 3.78385293 2.42944500   |
| H 0.79642600 0.72634293 3.90575400   | H -6.02322400 3.52000193 3.39998500   |
| H 0.57962700 -0.99086407 3.52548300  | H -6.63477800 4.86542093 2.41961500   |
| H -0.82134000 -0.59421207 7.05158500 | H -7.41730400 3.27259693 2.34228700   |
| H 0.48503300 -1.35689007 6.12871900  | C -5.63704700 -1.45398607 3.34788600  |
| H 0.52220000 0.38249793 6.42237200   | H -5.49130900 -0.65099507 2.61646200  |
| C -1.68995600 -2.60708207 4.77575300 | C -6.38119200 -2.59146907 2.63100900  |
| C -1.97951800 -1.24674407 4.61592500 | H -7.28453300 -2.19750207 2.15727300  |
| C -3.26055800 -0.90551807 4.13740100 | H -5.77104700 -3.04992407 1.84704400  |
| C -4.25343500 -1.86271707 3.84794000 | H -6.69314700 -3.37678307 3.33071100  |
| C -3.91082200 -3.20759107 4.04122600 | C -6.51851700 -0.91003107 4.49226500  |
| C -2.64289300 -3.57752307 4.48522400 | H -7.50100800 -0.61605507 4.10417700  |
| H -0.70431500 -2.91158607 5.11240800 | H -6.67196700 -1.67760007 5.26126500  |
| H -4.63856900 -3.98156107 3.82563000 | H -6.07533700 -0.03278407 4.97083700  |
| H -2.39044000 -4.62800307 4.58879700 | C -0.17951700 -3.34159907 1.51328600  |
| C -3.84600300 5.17347793 0.57344500  | C -1.09051300 -2.18597707 1.09475200  |
| C -4.16550600 4.05633293 1.35479100  | C -2.76921100 -3.84616207 0.48176600  |
| C -3.17302600 3.59009093 2.23876000  | C -1.79152300 -4.93624107 0.91411800  |
| C -1.89663600 4.17541693 2.34018900  | H -1.65580800 -1.82647007 1.96423500  |
| C -1.63549300 5.29450693 1.54074700  | H -0.49307500 -1.35663807 0.72029100  |
| C -2.59979300 5.78961593 0.66902300  | H 0.47895600 -3.61344407 0.67020900   |
| H -4.57574200 5.56870993 -0.12385100 | H 0.44162000 -3.04035607 2.36108900   |
| H -0.66493500 5.77693293 1.59557400  | H -3.42029600 -3.58415207 1.32675700  |
| H -2.37831800 6.65682193 0.05247800  | H -3.38554400 -4.17395207 -0.35556300 |
| C -6.24832300 3.66144193 -0.07063800 | H -2.33340900 -5.79155207 1.32904700  |

H -1.20652800 -5.27705507 0.04311400  
O -0.91914500 -4.47634907 1.93981000  
N -2.02381700 -2.65379807 0.07414700

**TS4**

H 0.31167107 0.45092838 0.00000000  
C -0.72114793 0.56651738 1.82983600  
C 0.30111907 0.88199238 1.00608700  
H -0.78299693 1.12191538 2.77612500  
C 1.52585107 1.68047738 1.37413000  
H 1.81306107 2.36127038 0.55714100  
H 1.32055407 2.29314138 2.26215500  
C 2.68335207 0.70786738 1.66991000  
H 2.88924107 0.09569538 0.78298500  
H 2.34332607 0.00482738 2.43637100  
C 6.65407907 -1.83297062 3.33399800  
C 6.70575307 -1.32181262 2.03455200  
C 5.87602607 -0.26127362 1.66400700  
C 4.97949407 0.30763438 2.57840900  
C 4.94634907 -0.20755162 3.88214300  
C 5.77356107 -1.26711762 4.26022000  
H 7.29770807 -2.65910862 3.62356000  
H 7.39283607 -1.74953162 1.30880300  
H 5.91540107 0.12636538 0.64826500  
H 4.25781307 0.22416738 4.60548500  
H 5.73094807 -1.65008962 5.27669200  
C 3.99003807 1.36821438 2.14826700  
H 3.76977407 2.03948738 2.98894500  
H 4.41279707 1.98869538 1.34745100

Cu -1.32547193 -1.23840862 1.58975500  
C -0.54856993 -5.30381562 1.87089600  
C -1.80552593 -5.30847062 2.38130400  
H 0.16883107 -6.09576562 1.72621800  
H -2.42281293 -6.10568362 2.76378300  
N -0.26199893 -3.98531762 1.53260300  
N -2.25224693 -3.99157762 2.33423000  
C -1.30952893 -3.15539662 1.81321900  
C 0.17690207 -3.60208562 -1.30877900  
C 0.12185607 -5.10547762 -1.65065300  
C 0.32629507 -2.76987362 -2.59045600  
H -0.78121693 -3.31658362 -0.86241700  
H -0.07276593 -5.71928262 -0.76521100  
H -0.67596993 -5.30092762 -2.37691400  
H 1.07090607 -5.43656762 -2.09025700  
H 0.41500807 -1.70439762 -2.36084100  
H 1.19405307 -3.08282362 -3.18502300  
H -0.56578293 -2.89591262 -3.21205000  
C -4.63067693 -4.36420062 0.69952800  
C -5.19164393 -3.39203262 -0.35445500  
C -5.36218493 -5.71886362 0.66551400  
H -3.58405293 -4.54512562 0.43672000  
H -4.61590893 -2.46159562 -0.37204100  
H -5.12717493 -3.84040262 -1.35273500  
H -6.24544093 -3.15433862 -0.16333500  
H -4.93500393 -6.42222262 1.39016900  
H -6.42624793 -5.60210962 0.90289300  
H -5.28857793 -6.16801162 -0.33158000  
C -5.89373493 -3.34996662 2.65240500  
C -4.67361793 -3.75227362 2.09408200

|                                      |                                        |
|--------------------------------------|----------------------------------------|
| C -3.51415393 -3.54951462 2.86191400 | H -1.96604793 -0.65622462 4.25323500   |
| C -3.53319093 -2.93389862 4.12901100 | H -2.86050193 -0.75937762 5.78813900   |
| C -4.77622693 -2.52635562 4.62612900 | C -2.30572893 -3.49367362 6.26782900   |
| C -5.94687193 -2.73845862 3.90224700 | H -1.37186293 -3.34866462 6.82379700   |
| H -6.81011793 -3.49871762 2.08829800 | H -3.13238293 -3.16912762 6.91055000   |
| H -4.82766193 -2.03131062 5.59129600 | H -2.42899093 -4.56632362 6.07952100   |
| H -6.89680393 -2.39602662 4.29973400 | Br -2.27768593 -0.71824362 -1.09457400 |
| C 3.26784407 -2.84115562 1.65655600  | N -3.96553993 1.31726038 2.19488000    |
| C 2.01072007 -3.28333762 2.08540100  | C -4.33704193 1.63356238 3.57115000    |
| C 1.03637907 -3.52528362 1.09794000  | C -5.86042993 1.58127738 3.70417700    |
| C 1.26422007 -3.32572762 -0.27677200 | O -6.38264493 0.33141838 3.27036800    |
| C 2.54008407 -2.88645862 -0.65076800 | C -4.51604793 0.05071238 1.72563600    |
| C 3.52898507 -2.65142662 0.30253300  | C -6.03182793 0.06869838 1.91677600    |
| H 4.04365507 -2.62028162 2.38131800  | C -2.98202693 2.04947238 1.58028000    |
| H 2.76035107 -2.71640762 -1.69891900 | C -2.70930793 1.79906138 0.13577900    |
| H 4.50960507 -2.29923662 -0.00387000 | O -2.45066893 3.02775838 2.11962500    |
| C 1.41814407 -2.05095762 4.19863200  | C -1.74200393 2.67963238 -0.56578300   |
| C 1.70663807 -3.42914762 3.57287500  | H -3.95163593 2.62381638 3.81690700    |
| H 0.79857907 -4.03061662 3.68263000  | H -3.88399193 0.89920638 4.25155900    |
| H 0.62768307 -1.52617362 3.65141000  | H -6.30676193 2.40261438 3.11827500    |
| H 1.10450307 -2.16363262 5.24399300  | H -6.15808393 1.69600038 4.75115800    |
| H 2.31936307 -1.42881062 4.17968500  | H -4.25833493 -0.12959462 0.68415300   |
| C 2.82545807 -4.15598162 4.33870700  | H -4.07178293 -0.77072862 2.30842100   |
| H 3.04780307 -5.13139762 3.89125400  | H -6.45600893 -0.90510962 1.66707800   |
| H 3.75177407 -3.57109462 4.35164000  | H -6.47478493 0.83393538 1.25619300    |
| H 2.52292407 -4.31698062 5.38016200  | H -3.55407093 1.46928538 -0.45470700   |
| C -2.27074793 -2.69807762 4.95046100 | H -0.98293293 3.06092838 0.11475700    |
| H -1.41134293 -3.05260662 4.37615100 | H -2.31461793 3.53362838 -0.96934700   |
| C -2.04309393 -1.19714062 5.20242900 | H -1.28579393 2.16559738 -1.41323500   |
| H -1.11134193 -1.04163162 5.75734500 |                                        |

**TS6 (MECP)**

|                                      |                                      |
|--------------------------------------|--------------------------------------|
| H -0.63640561 0.47906397 6.72699600  | H -0.63640561 0.47906397 6.72699600  |
| N -1.30917061 2.27663797 4.08099800  | N -1.30917061 2.27663797 4.08099800  |
| H -0.85543761 0.46419097 0.00000000  | N -1.80408961 0.34864797 4.90782200  |
| C -1.76729661 -0.58577303 1.58397500 | C -2.04312261 1.15845597 3.84073900  |
| C -0.84974261 -0.43322503 0.62001700 | C 0.47310639 2.66128197 1.81102400   |
| H -1.70283861 -1.48627503 2.20267700 | C 1.76432839 2.78942997 2.64593800   |
| C 0.31393439 -1.38005303 0.39526400  | C 0.80315939 2.71716697 0.31121100   |
| H 0.01744539 -2.40819603 0.64155600  | H 0.04255439 1.67491297 2.01147200   |
| H 0.62491339 -1.37941003 -0.65891300 | H 1.56423839 2.68548297 3.71677900   |
| C 1.50370839 -0.98337803 1.28863400  | H 2.48376639 2.00986397 2.36898200   |
| H 1.16569739 -0.97601303 2.33090500  | H 2.23526839 3.76657797 2.48272300   |
| H 1.80620239 0.04703297 1.07007800   | H -0.10573161 2.70841997 -0.29978300 |
| C 5.55092639 -0.72689103 4.24380700  | H 1.37838139 3.61371797 0.05239900   |
| C 4.78650339 -1.88485403 4.39816300  | H 1.41099939 1.85237597 0.02797000   |
| C 3.90340639 -2.28116603 3.39090200  | C -0.37505461 -2.17887803 4.57385900 |
| C 3.76631439 -1.53104203 2.21574100  | C -0.09723961 -3.34980703 3.61445800 |
| C 4.54319039 -0.37207203 2.07217200  | C 0.57683539 -2.27188403 5.78369500  |
| C 5.42720339 0.02837097 3.07482800   | H -0.14758661 -1.25229303 4.03683100 |
| H 6.24089339 -0.41791503 5.02463600  | H -0.80794961 -3.37384503 2.78295900 |
| H 4.87909739 -2.48350503 5.30082500  | H 0.90962339 -3.25413503 3.19692100  |
| H 3.31463939 -3.18740903 3.51682000  | H -0.14604861 -4.31569203 4.12965100 |
| H 4.44943339 0.22099497 1.16466700   | H 0.44538739 -1.43354903 6.47383000  |
| H 6.02070339 0.92948297 2.94283800   | H 0.39646439 -3.19660503 6.34482900  |
| C 2.73725639 -1.89713803 1.16967600  | H 1.61981539 -2.26826103 5.44592000  |
| H 3.16195339 -1.80911103 0.16058800  | C -2.55015161 -3.27902603 5.29667800 |
| H 2.43162939 -2.94451203 1.29142400  | C -1.83330661 -2.10835603 5.01320700 |
| Cu -3.09201761 0.68135797 2.20384600 | C -2.51159461 -0.88486003 5.16741300 |
| C -0.61199161 2.16387697 5.28219500  | C -3.85891561 -0.79803403 5.58459200 |
| C -0.92822261 0.95560597 5.80616200  | C -4.52921461 -2.00154703 5.82804500 |
| H 0.02434639 2.95440197 5.64428800   | C -3.88354061 -3.22800703 5.69124300 |

H -2.06338661 -4.24252203 5.18808100  
H -5.57351561 -1.98462703 6.11507800  
H -4.43491961 -4.14653903 5.86845300  
C -2.40302561 5.67108197 3.05146400  
C -2.34113661 4.46839897 3.76418100  
C -1.40323861 3.51086297 3.33008900  
C -0.55233561 3.71008197 2.22796500  
C -0.66196761 4.93052897 1.55013300  
C -1.57573261 5.90015797 1.95669700  
H -3.11561361 6.43141397 3.35268200  
H -0.03017061 5.12553797 0.69139000  
H -1.64468861 6.83883097 1.41323300  
C -4.66111461 4.76550697 4.80102700  
C -3.22296661 4.25441197 4.98940000  
H -3.29024161 3.17963297 5.17515300  
H -5.10917461 4.35044897 3.89557400  
H -5.27132561 4.45898097 5.65890400  
H -4.70182761 5.86005297 4.74946500  
C -2.58469361 4.91073197 6.23102900  
H -1.58271361 4.51859297 6.43264500  
H -2.49872161 5.99492997 6.09091800  
H -3.20337961 4.72948097 7.11778100  
C -4.54575061 0.54536197 5.81446000  
H -4.18123061 1.24360897 5.05800500  
C -6.06928161 0.50509697 5.64062300  
H -6.46361161 1.52507397 5.69207000  
H -6.34234461 0.09964097 4.66287400  
H -6.56256161 -0.08192003 6.42491300  
C -4.17822961 1.10131497 7.20633000  
H -4.63540761 2.08724297 7.35234300

H -4.54398761 0.43510097 7.99716800  
H -3.09657561 1.21298097 7.33079700  
Br -5.06161961 1.97500997 2.30823100  
C -7.27176661 -3.36298203 2.63469000  
H -7.49605961 -3.99366503 1.75785600  
H -8.11925861 -3.40930403 3.32587000  
C -4.98897361 -3.85913803 2.51728200  
H -4.17039361 -4.27153903 3.11236500  
H -5.13801861 -4.49181803 1.62476500  
C -7.02580461 -1.92483503 2.18770100  
H -6.93199161 -1.27977003 3.07491200  
H -7.84901061 -1.54995703 1.57880300  
C -4.64607161 -2.43461803 2.07870400  
H -3.78235761 -2.46642503 1.41650700  
H -4.36902061 -1.83693803 2.96056900  
N -5.79609161 -1.84450003 1.40205500  
C -5.72467961 -0.86602303 0.41366900  
C -4.41918561 -0.56323803 -0.17671100  
O -6.74043661 -0.28099903 0.02248800  
O -6.14766961 -3.88999103 3.33740800  
C -4.29868861 0.57751497 -1.12294300  
H -4.64529061 0.28565197 -2.12863200  
H -4.91900161 1.41720597 -0.79803600  
H -3.25391461 0.89567597 -1.21301600  
H -3.60306761 -1.27083903 -0.12554900  
  
**INT4**  
  
Br 0.76259942 0.61007957 0.00000000  
Cu -1.29517258 -0.67493743 -0.11582300

|                                       |                                       |
|---------------------------------------|---------------------------------------|
| H -3.84518558 -0.64767143 -1.79452200 | H -0.62393458 -1.22200943 -3.89740300 |
| C -2.83294358 -1.78600543 -0.35974200 | O -1.76958758 -3.53007443 -2.79418200 |
| C -3.87293658 -1.51822443 -1.14343600 | C -3.16430258 1.48566857 3.03073400   |
| H -2.79312458 -2.67222343 0.27141500  | C -2.98794658 0.29204357 3.64188200   |
| C -5.15883558 -2.31166543 -1.17428400 | H -3.62442258 2.39926357 3.36784100   |
| H -5.51149058 -2.40402243 -2.21096000 | H -3.23680258 -0.04647843 4.63364400  |
| H -4.98200058 -3.32981043 -0.80981300 | N -2.60053158 1.37664157 1.76172100   |
| C -6.24093258 -1.63715043 -0.31422800 | N -2.34070658 -0.53254943 2.72488600  |
| H -6.40986158 -0.61194743 -0.66511900 | C -2.09645158 0.12728357 1.55401400   |
| H -5.86791858 -1.53923943 0.71182900  | C -0.42523458 3.22187157 2.37222200   |
| C -10.06812658 -0.46852343 2.71140100 | C -0.91491058 4.03728457 3.58857200   |
| C -9.95369358 0.08581457 1.43392000   | C 1.03419042 3.59972557 2.06284100    |
| C -9.18170658 -0.55018743 0.46045200  | H -0.43447858 2.16246657 2.64252400   |
| C -8.50997858 -1.74830743 0.74223700  | H -1.92767858 3.76224857 3.89655200   |
| C -8.63677358 -2.29558343 2.02607900  | H -0.24861358 3.87851957 4.44482200   |
| C -9.40851158 -1.66392843 3.00402300  | H -0.91714258 5.10857057 3.35453900   |
| H -10.67031258 0.02445657 3.46977100  | H 1.38486842 3.11158357 1.15185300    |
| H -10.46869458 1.01259057 1.19426400  | H 1.15809442 4.68412057 1.95579300    |
| H -9.09678158 -0.11338943 -0.53265800 | H 1.67630542 3.28164757 2.89255200    |
| H -8.12842558 -3.22882643 2.25988400  | C 0.44039842 -0.70903043 3.51218500   |
| H -9.49693258 -2.10811943 3.99227200  | C 1.89427242 -1.02238743 3.12910500   |
| C -7.59180458 -2.37553943 -0.28224300 | C 0.37170442 -0.03473543 4.89734800   |
| H -7.42667358 -3.43385143 -0.04166000 | H 0.08537042 0.00730957 2.76947700    |
| H -8.04739658 -2.34864643 -1.28089900 | H 1.94429642 -1.53314943 2.16307600   |
| C -1.06017558 -3.10510243 -1.88422000 | H 2.45266442 -0.08634543 3.02942700   |
| C -0.66761258 -1.65452543 -1.78829800 | H 2.40089942 -1.63534743 3.88441800   |
| H 0.40044142 -1.54596543 -1.59462600  | H -0.65159258 0.26006557 5.15298400   |
| C -1.08376258 -0.82284043 -2.98350200 | H 0.73526942 -0.71210843 5.67969400   |
| H -2.16473058 -0.85461043 -3.13743800 | H 0.99491142 0.86747157 4.91012600    |
| H -0.75796358 0.21360957 -2.85270400  | C 0.00019642 -3.18998343 3.84960700   |

|                                      |                                       |
|--------------------------------------|---------------------------------------|
| C -0.47288958 -1.92874143 3.46698800 | H -5.70666758 -3.83985443 1.57058500  |
| C -1.82706958 -1.83696043 3.08035700 | H -4.06511058 -4.34774843 1.13630600  |
| C -2.69788558 -2.94509243 3.08036400 | H -4.80783458 -4.91460243 2.63970600  |
| C -2.16251558 -4.18375043 3.45531000 | C -5.04721858 -2.55063643 3.95189600  |
| C -0.82837758 -4.30841043 3.83158700 | H -6.09377658 -2.41737643 3.65360200  |
| H 1.03611942 -3.30055343 4.15117300  | H -4.99111258 -3.39390843 4.65065800  |
| H -2.79419758 -5.06501743 3.44536600 | H -4.73791258 -1.65004243 4.48858400  |
| H -0.43032158 -5.28314843 4.09652400 | C 1.07616542 -4.61073143 0.78141000   |
| C -3.15623858 3.88134757 -0.93968000 | C 0.12161242 -3.51621443 0.30443100   |
| C -3.34481658 2.74487657 -0.14376700 | C -1.20341558 -5.26970543 -0.75975600 |
| C -2.42556858 2.52759357 0.89904000  | C -0.19316658 -6.28610243 -0.23795800 |
| C -1.36581458 3.41319757 1.18583700  | H -0.60118958 -3.29597043 1.10070100  |
| C -1.23222958 4.53696857 0.36252900  | H 0.69460742 -2.60769043 0.11377100   |
| C -2.10929258 4.76528157 -0.69323300 | H 1.88912842 -4.73515143 0.04605900   |
| H -3.83803758 4.08141057 -1.75834400 | H 1.50965342 -4.33117543 1.74487700   |
| H -0.42457458 5.23698257 0.54728400  | H -2.04046358 -5.20126043 -0.04413900 |
| H -1.98035158 5.64020557 -1.32481000 | H -1.60295358 -5.56367943 -1.73112200 |
| C -5.00922958 1.78501157 -1.82178700 | H -0.68587158 -7.23797143 -0.01661500 |
| C -4.54276858 1.82675457 -0.35772700 | H 0.58573742 -6.45973843 -0.99942000  |
| H -4.24406258 0.81256957 -0.07732900 | O 0.40317442 -5.84650443 0.97878900   |
| H -4.17779158 1.57602357 -2.50382800 | N -0.57625758 -3.95738743 -0.90058300 |
| H -5.76444058 1.00399457 -1.95494200 |                                       |
| H -5.46943158 2.73102357 -2.12951400 | <b>TS8</b>                            |
| C -5.71187258 2.23812457 0.56215400  |                                       |
| H -5.42237158 2.20880257 1.61734800  | Br -0.27188327 0.14588859 0.00000000  |
| H -6.04470358 3.25715557 0.33064400  | Cu -2.24660327 -1.32138141 0.10447200 |
| H -6.56403358 1.56023857 0.43343300  | H -4.65096727 -1.73750241 -1.77902300 |
| C -4.17107158 -2.81720143 2.71040700 | C -3.48385427 -2.72223341 -0.34348500 |
| H -4.26556258 -1.95774843 2.03927600 | C -4.58618327 -2.56992341 -1.08292400 |
| C -4.71055758 -4.05304343 1.96949600 | H -3.36366827 -3.57948241 0.31803200  |



|                                       |                                      |
|---------------------------------------|--------------------------------------|
| C -5.80142227 -3.46181041 -1.00102900 | H -4.89954527 1.53048759 3.52916700  |
| H -6.18842327 -3.64383941 -2.01405200 | H -4.22034427 -0.82023841 4.85321600 |
| H -5.52037127 -4.43938141 -0.59273900 | N -3.77216627 0.59060759 1.94054200  |
| C -6.91141527 -2.84566641 -0.13351700 | N -3.28028627 -1.24482141 2.94876800 |
| H -7.17031427 -1.85120341 -0.51359000 | C -3.12229127 -0.59331841 1.75993500 |
| H -6.52524327 -2.68485841 0.87933100  | C -1.82882027 2.66663959 2.54764700  |
| C -10.81804227 -1.92304941 2.90050000 | C -2.41158727 3.51507459 3.69796300  |
| C -10.70886827 -1.36061941 1.62587100 | C -0.38746527 3.11674559 2.25271700  |
| C -9.88546127 -1.95229941 0.66704700  | H -1.77481927 1.62796559 2.88501000  |
| C -9.15551727 -3.11322341 0.96100000  | H -3.41905427 3.19582259 3.98228600  |
| C -9.27818327 -3.66948941 2.24088900  | H -1.77151327 3.44387759 4.58532900  |
| C -10.10158127 -3.08201641 3.20456900 | H -2.46827527 4.57012059 3.40434900  |
| H -11.46012927 -1.46436841 3.64754100 | H 0.02601773 2.57358259 1.40099000   |
| H -11.26797427 -0.46223241 1.37726600 | H -0.33054627 4.19307759 2.05181800  |
| H -9.80626327 -1.50980741 -0.32402000 | H 0.24138673 2.91816059 3.12910900   |
| H -8.72602727 -4.57540141 2.48248500  | C -0.47064627 -1.04517041 3.62986500 |
| H -10.18501927 -3.53237341 4.19039500 | C 1.01327873 -1.22763541 3.27768400  |
| C -8.19403727 -3.69343741 -0.05118100 | C -0.62685027 -0.23810941 4.93415900 |
| H -7.93637327 -4.72437241 0.22444700  | H -0.89467727 -0.45807541 2.81223700 |
| H -8.66036427 -3.74303041 -1.04428600 | H 1.13258873 -1.82835541 2.37089800  |
| C -1.66343027 -4.03674741 -1.56419800 | H 1.45813073 -0.24858541 3.07562700  |
| C -1.65277827 -2.52388841 -1.53240300 | H 1.58204273 -1.69387141 4.09152200  |
| H -0.66643927 -2.16203741 -1.23847400 | H -1.67781227 -0.02597241 5.15578500 |
| C -2.06550927 -1.87998841 -2.83886400 | H -0.20250827 -0.78523141 5.78497000 |
| H -3.01556127 -2.27596141 -3.19976700 | H -0.10174327 0.72074359 4.84897500  |
| H -2.12414727 -0.79251341 -2.72949400 | C -0.61764227 -3.53041741 4.16276000 |
| H -1.30886927 -2.10224041 -3.60193800 | C -1.23851827 -2.36119141 3.70623200 |
| O -2.19671127 -4.65524641 -2.48222600 | C -2.59596927 -2.45870241 3.33107300 |
| C -4.33858527 0.66790159 3.21045900   | C -3.31177427 -3.67112341 3.35778800 |
| C -4.01872027 -0.48080841 3.85081800  | C -2.63325327 -4.81088041 3.80855300 |

|                                       |                                       |
|---------------------------------------|---------------------------------------|
| C -1.30352427 -4.74136641 4.21467300  | H -6.77608227 -3.55956441 3.73672100  |
| H 0.42305973 -3.49696241 4.46614500   | H -5.61880927 -4.34965941 4.83187500  |
| H -3.14687527 -5.76576741 3.83337100  | H -5.57509527 -2.59501341 4.60065800  |
| H -0.79151827 -5.63957541 4.54688300  | C 0.74056873 -4.83598841 1.15490300   |
| C -4.47794627 2.91178359 -0.88497900  | C -0.48670627 -4.05928341 0.67698400  |
| C -4.58268727 1.79510059 -0.04719300  | C -1.26909227 -6.12793541 -0.36331600 |
| C -3.69851527 1.72478459 1.04485300   | C -0.01062827 -6.81285941 0.16152900  |
| C -2.74385927 2.72241459 1.32798500   | H -1.24218727 -4.05197141 1.47175000  |
| C -2.69315227 3.82194359 0.46346100   | H -0.19105527 -3.02760141 0.48246000  |
| C -3.54295427 3.91309959 -0.63393000  | H 1.55113173 -4.73243641 0.41380300   |
| H -5.13326227 3.00528859 -1.74366400  | H 1.08338273 -4.43533141 2.11179700   |
| H -1.96969527 4.60977859 0.64540100   | H -2.08936127 -6.28484341 0.35697000  |
| H -3.47826327 4.77022559 -1.29887500  | H -1.57171727 -6.53368641 -1.32929000 |
| C -6.08631127 0.61762759 -1.74132500  | H -0.21476027 -7.86221441 0.39558600  |
| C -5.65455827 0.73423959 -0.27138500  | H 0.78125373 -6.76877041 -0.60496200  |
| H -5.23736427 -0.23364941 0.02542000  | O 0.44269073 -6.20861641 1.36823300   |
| H -5.22389127 0.49812159 -2.40634600  | N -1.03469427 -4.69291341 -0.52225200 |
| H -6.74148727 -0.24911041 -1.87471200 |                                       |
| H -6.64936627 1.49822259 -2.07119500  | <b>P</b>                              |
| C -6.88034527 1.01162459 0.62474300   |                                       |
| H -6.60721427 1.02930359 1.68439300   | N 0.04641910 0.35809018 0.00000000    |
| H -7.32678127 1.98145159 0.37390200   | C 0.71408510 -0.71617282 -0.73960900  |
| H -7.64489927 0.23707659 0.49409900   | C 2.22735210 -0.50607982 -0.70176800  |
| C -4.76675927 -3.75169541 2.91261700  | O 2.69939310 -0.41145982 0.64048400   |
| H -4.92875627 -2.93935341 2.19662300  | C 0.55508510 0.50217918 1.36217200    |
| C -5.09906427 -5.07316741 2.19853700  | C 2.08024610 0.66251618 1.33000700    |
| H -6.09550527 -5.01111541 1.75024100  | C -0.79237790 1.21763518 -0.67278500  |
| H -4.38062327 -5.30212941 1.40470700  | C -1.43747590 2.37326218 0.11171400   |
| H -5.11012627 -5.91825841 2.89607000  | C -0.50835690 3.60576018 0.00076200   |
| C -5.73940527 -3.54865541 4.09246000  | C -2.80244490 2.67235418 -0.45471800  |

C -3.90338490 2.83288418 0.28196000  
C -5.27189090 3.13219518 -0.26464400  
C -6.28029190 2.00828618 0.03352900  
C -7.69361890 2.31681818 -0.49619300  
C -8.67508490 1.20686118 -0.19354300  
C -9.41353490 1.20606318 0.99715600  
C -10.28167990 0.15702718 1.30311200  
C -10.42504890 -0.91374282 0.41846900  
C -9.69467290 -0.92577582 -0.77165100  
C -8.82824490 0.12599618 -1.07212100  
O -1.00777090 1.09346718 -1.87602500  
H 0.33581310 -0.71195282 -1.76210700  
H 0.46854410 -1.67606882 -0.26517000  
H 2.48570610 0.40859718 -1.26105000  
H 2.75084810 -1.35432882 -1.15286100  
H 0.10464110 1.35915818 1.86226000  
H 0.30163610 -0.40065782 1.93552300  
H 2.48783710 0.65871318 2.34597200  
H 2.33363610 1.62444418 0.85062400  
H -1.55559790 2.11295518 1.16870300  
H -0.94439290 4.45715218 0.53267000  
H 0.48430410 3.40211818 0.42088400  
H -0.37959890 3.88238418 -1.05088000  
H -2.84595990 2.76436418 -1.53819700  
H -3.84178590 2.71666518 1.36716600  
H -5.65082990 4.06916818 0.17292300  
H -5.21287590 3.29508218 -1.34901500  
H -5.92138790 1.07066818 -0.41001400  
H -6.33362890 1.83448918 1.11731600  
H -8.04524490 3.25815018 -0.05256700

H -7.63950990 2.48354618 -1.58031500  
H -9.30760690 2.03924418 1.68920900  
H -10.84898390 0.17786318 2.23024500  
H -11.10278790 -1.73032382 0.65292300  
H -9.80227690 -1.75308182 -1.46860200  
H -8.26286090 0.11166218 -2.00177100

## **Cata2**

Cu -0.16578248 0.87533155 0.00000000  
C 0.51369452 0.92172855 -4.05830000  
C -0.84537248 0.92176055 -4.05828300  
H 1.23092952 0.92994955 -4.86363200  
H -1.56262748 0.93001255 -4.86359700  
N 0.90746152 0.90802055 -2.72618000  
N -1.23910648 0.90806455 -2.72615300  
C -0.16581248 0.89928655 -1.88868700  
C 2.16433252 3.45861455 -2.17120700  
C 2.96951952 4.47233855 -3.00250300  
C 1.79018952 4.03438155 -0.79091600  
H 1.22972652 3.26920255 -2.70951200  
H 3.23548652 4.06295655 -3.98374200  
H 2.38044952 5.38333255 -3.15866200  
H 3.89706752 4.76493655 -2.49770800  
H 1.18780552 3.32310755 -0.21541200  
H 2.68930552 4.25967155 -0.20569600  
H 1.21470552 4.96069955 -0.90494100  
C -2.49579848 3.45868655 -2.17088100  
C -2.12169048 4.03435855 -0.79054100  
C -3.30090148 4.47249155 -3.00216000

|                                       |                                       |
|---------------------------------------|---------------------------------------|
| H -1.56117548 3.26925755 -2.70915000  | H 2.69213052 -2.51228245 -0.27327900  |
| H -1.51937748 3.32301755 -0.21504500  | C 2.93992052 -2.65628545 -3.07719500  |
| H -1.54614648 4.96064755 -0.90449000  | H 3.19201052 -2.22530245 -4.05285600  |
| H -3.02082148 4.25967455 -0.20535200  | H 3.87462552 -2.95969145 -2.59238700  |
| H -3.56681248 4.06318555 -3.98344600  | H 2.34818652 -3.56347345 -3.24510500  |
| H -4.22847748 4.76507455 -2.49740700  | C -2.47934648 -1.66054745 -2.21235800 |
| H -2.71179848 5.38348155 -3.15821500  | H -1.53928148 -1.45553545 -2.73517800 |
| C -4.53799648 2.09602355 -1.51418400  | C -2.11896348 -2.26827545 -0.84227500 |
| C -3.22702848 2.13271255 -2.00273100  | H -1.53795248 -3.18897245 -0.97250600 |
| C -2.60183648 0.89963955 -2.25747900  | H -1.52645148 -1.56903845 -0.24226900 |
| C -3.21805348 -0.34166945 -2.02199600 | H -3.02368248 -2.51220745 -0.27340700 |
| C -4.52944048 -0.32203945 -1.53324800 | C -3.27185448 -2.65616245 -3.07729600 |
| C -5.18396348 0.88275055 -1.28612700  | H -2.68015348 -3.56334745 -3.24534000 |
| H -5.05165848 3.02665955 -1.29271400  | H -4.20648148 -2.95958745 -2.59234700 |
| H -5.03632448 -1.25989245 -1.32701100 | H -3.52410248 -2.22513845 -4.05289800 |
| H -6.19965948 0.87614355 -0.90009600  | Br -0.16573748 0.84199955 2.27928500  |
| C 4.19775152 -0.32217645 -1.53324700  |                                       |
| C 2.88634552 -0.34177145 -2.02194900  | <b>TS7</b>                            |
| C 2.27020252 0.89955255 -2.25754000   |                                       |
| C 2.89548652 2.13261155 -2.00294300   | H -0.45755965 1.94960209 0.00000000   |
| C 4.20646652 2.09588755 -1.51443300   | C -0.92930765 1.79032009 2.07596100   |
| C 4.85236052 0.88259555 -1.28627000   | C -0.11780565 2.12952209 1.01937800   |
| H 4.70458052 -1.26004245 -1.32693300  | H -0.67436265 2.18545509 3.05849100   |
| H 4.72019852 3.02651155 -1.29307600   | C 1.25812435 2.73020509 1.19776700    |
| H 5.86806852 0.87596155 -0.90027300   | H 1.72794235 2.32374709 2.10142500    |
| C 1.78734452 -2.26831145 -0.84202300  | H 1.90899035 2.47516609 0.34947000    |
| C 2.14756152 -1.66062545 -2.21216900  | C 1.17188535 4.26278909 1.33609500    |
| H 1.20743152 -1.45559345 -2.73486200  | H 0.49486235 4.50178709 2.16347800    |
| H 1.19495352 -1.56903345 -0.24194600  | H 0.71256735 4.69320209 0.44031900    |
| H 1.20626752 -3.18898045 -0.97215800  | C 1.75096335 9.16337209 2.26471000    |

|                                      |                                      |
|--------------------------------------|--------------------------------------|
| C 2.08322035 8.32939209 3.33385600   | H -0.14104865 4.49750209 -1.41980400 |
| C 2.36494135 6.97927909 3.10950000   | C -0.57014665 4.24247409 4.88042800  |
| C 2.32020035 6.43800309 1.81794500   | C 0.85772735 3.66358609 4.93336300   |
| C 1.99379535 7.28981609 0.75194900   | C -0.59605965 5.62712509 5.55908400  |
| C 1.71090435 8.63880009 0.96995300   | H -0.83375665 4.38530909 3.82673400  |
| H 1.53218935 10.21383509 2.43656300  | H 0.91938035 2.63714309 4.55802000   |
| H 2.12836335 8.72886309 4.34392000   | H 1.52605535 4.28967609 4.33441500   |
| H 2.62915635 6.33848209 3.94739800   | H 1.24934935 3.66653409 5.95726600   |
| H 1.96134235 6.88752209 -0.25869800  | H -1.58222865 6.09868809 5.50100500  |
| H 1.46265735 9.28145209 0.12907400   | H -0.32924865 5.54136009 6.61921200  |
| C 2.52398535 4.95857509 1.57879600   | H 0.12443635 6.29633809 5.07470500   |
| H 3.17688935 4.79485809 0.71074500   | C -1.30823765 2.60271209 6.66646700  |
| H 3.02370135 4.49872109 2.44043000   | C -1.59953465 3.29445609 5.48535100  |
| Cu -2.86243665 1.58659309 1.74520200 | C -2.85755765 3.06091809 4.89283200  |
| C -4.07410265 5.48497309 2.53778800  | C -3.78841665 2.14132409 5.41477400  |
| C -3.66157465 5.14922509 3.78580700  | C -3.43307965 1.46413309 6.58807400  |
| H -4.48635365 6.39868809 2.14084700  | C -2.21445765 1.69941209 7.21557600  |
| H -3.64253065 5.70861309 4.70621600  | H -0.34942165 2.75544509 7.15002700  |
| N -3.89917565 4.35546609 1.74581500  | H -4.12610865 0.74547509 7.01494900  |
| N -3.23435565 3.82587509 3.72557300  | H -1.96145965 1.16594209 8.12761500  |
| C -3.39310165 3.32185909 2.47060200  | C -6.25873265 3.74862109 -1.05196000 |
| C -2.07879765 4.80019509 -0.48912600 | C -5.76087065 3.86225109 0.25158500  |
| C -1.89761365 6.30849109 -0.22094000 | C -4.40958065 4.22371009 0.39905000  |
| C -1.19734065 4.35663109 -1.66750500 | C -3.54809265 4.44706609 -0.69193100 |
| H -1.72927165 4.25611209 0.39599100  | C -4.10248065 4.33087209 -1.97177300 |
| H -2.46703165 6.63503709 0.65484800  | C -5.44149965 3.98846009 -2.15117300 |
| H -0.84365365 6.54502309 -0.03490300 | H -7.29299365 3.45562109 -1.20418600 |
| H -2.23551865 6.89637309 -1.08314000 | H -3.47870865 4.49353109 -2.84311700 |
| H -1.35238965 3.29929509 -1.90640400 | H -5.84404665 3.89520409 -3.15612700 |
| H -1.39594165 4.94585309 -2.57038000 | C -6.92395165 2.02311209 1.50611900  |

|                                       |                                      |
|---------------------------------------|--------------------------------------|
| C -6.65918465 3.53944309 1.43940600   | H 0.03479835 -1.11650991 0.52959700  |
| H -6.13752965 3.82146209 2.35875400   | H 1.23004335 -0.11341991 -0.29712200 |
| H -5.98809065 1.45653709 1.54519400   | N 1.67850535 -0.50222491 1.71412800  |
| H -7.51950165 1.77928809 2.39405000   | C 0.99393135 -0.11896291 2.85616200  |
| H -7.47727865 1.68418609 0.62277900   | C -0.46413265 -0.24029091 2.87621700 |
| C -7.97254665 4.34086009 1.41378500   | O 1.61308135 0.36078809 3.82471200   |
| H -7.78082765 5.41911809 1.37126700   | O 3.23063735 -1.95390591 -0.15601400 |
| H -8.59360265 4.07617909 0.55084400   | C -1.14861265 -0.21499591 4.20805600 |
| H -8.55774265 4.13185809 2.31673200   | H -1.10606365 -1.20590891 4.68633400 |
| C -5.14644565 1.86421009 4.77884600   | H -0.67244365 0.49542309 4.88602400  |
| H -5.24012565 2.46809909 3.87420800   | H -2.20501865 0.04749009 4.09921700  |
| C -5.27448465 0.39210209 4.34496100   | H -0.97413265 -0.79333891 2.09909100 |
| H -6.26058065 0.21242809 3.90404900   |                                      |
| H -4.52472865 0.13046209 3.59068300   |                                      |
| H -5.15532765 -0.28944291 5.19479100  |                                      |
| C -6.29477565 2.27694909 5.71835100   |                                      |
| H -7.26058365 2.13175009 5.22012100   |                                      |
| H -6.29906465 1.67754109 6.63596500   |                                      |
| H -6.21227265 3.33134509 6.00630200   |                                      |
| Br -3.53000665 -0.31608291 0.55906300 |                                      |
| C 3.77897035 -1.58489091 1.10531300   |                                      |
| H 3.64675935 -2.40484391 1.83160700   |                                      |
| H 4.85019835 -1.42942291 0.94214800   |                                      |
| C 1.82882335 -2.17159291 -0.06176100  |                                      |
| H 1.48645535 -2.43690591 -1.06688100  |                                      |
| H 1.61749735 -3.01340991 0.61970300   |                                      |
| C 3.12416035 -0.31541791 1.64787500   |                                      |
| H 3.35699335 0.52641509 0.97726800    |                                      |
| H 3.48381135 -0.07374891 2.64864300   |                                      |
| C 1.10243235 -0.92073291 0.43995700   |                                      |
